# Supplementary material for: Early Pregnancy Systolic Blood Pressure Patterns Predict Early‐ and Later‐Onset Preeclampsia and Gestational Hypertension Among Ostensibly Low‐to‐Moderate Risk Groups
Source: PubMed Central journal article supplement — J Am Heart Assoc. 2023 Jul 12;12(15):e029617. doi: 10.1161/JAHA.123.029617 (PMC10492985; doi:10.1161/jaha.123.029617), 2023-07-12

# **Supplemental Material**

## Data S1.

### Supplemental Methods

#### Enhanced Methodology

##### 1. Classification of HDP Outcomes - Preeclampsia and Gestational Hypertension.

To improve and refine the accuracy of the HDP outcome classification, we included additional ICD-9 codes for unspecified hypertension and selected the last diagnosis code closest to the delivery date recorded in the delivery hospitalization discharge summary. When both preeclampsia and gestational hypertension ICD-9/10 codes were found in a record, we classified the outcome as preeclampsia.

Our methodology to improve the accurate classification of gestational hypertension and to define early preeclampsia and late preeclampsia with the following modifications:

- 1) The ICD-codes closest to the delivery hospitalization were selected to classify the specific hypertensive disorder of pregnancy: preeclampsia and gestational hypertension. This process prioritized the discharge summary diagnosis codes in lieu of earlier outpatient visits that are more likely to change later in pregnancy and definitively listed at delivery hospitalization.
- 2) The inclusion of the additional ICD-9 codes, 642.90 through 642.94, for unspecified hypertension complicating pregnancy, which had been previously utilized by mapping only the ICD-10 codes.
- 3) The gestational age of the diagnosis based on the ICD codes was utilized to categorize early preeclampsia and late preeclampsia for the development and validation datasets.

##### 2. Methods to Identify the BPT Trajectory Groups:

We first fit group-based trajectory models to identify distinct early pregnancy BP trajectory groups during the first 20 weeks' gestation using the model development dataset. This statistical approach combines finite mixture modeling and growth curve modeling into a unified model to identify latent classes of individuals with similar patterns of change over time.<sup>31</sup> Specifically, we fit each trajectory curves with third order polynomial terms to allow for curvature in the patterns of longitudinal BP measurements during the first 20 weeks' gestation; we tested for statistical significance of quadratic and cubic terms to determine the appropriate shape of each trajectory pattern, with model parameters estimated by maximum likelihood, and we used the Bayes Factor to determine the number of latent groups.<sup>29</sup> [Reference: Gunderson EP, et al. Early Pregnancy Blood Pressure Patterns Identify Risk of Hypertensive Disorders of Pregnancy Among Racial and Ethnic Groups. *Hypertension*. 2022;79(3):599-613.]

### 3. Models and Prediction Equations

**Table S4** shows the model coefficients for prediction of early-onset preeclampsia, and later-onset preeclampsia and gestational hypertension. The equations for the prediction of each HDP in the models are also shown below.

#### **Prediction Models – Enhanced Supplemental Methods.**

General Formula: For a multinomial model with  $M$  categories and reference category  $m = 1$ ,  
 $\Pr(Y = 1|X = x) = \frac{1}{1 + \sum_{j=2}^M \exp(x\beta_j)}$  and  $\Pr(Y = m|X = x) = \frac{\exp(x\beta_m)}{1 + \sum_{j=2}^M \exp(x\beta_j)}$  for  $m = 2, \dots, M$ .

Example prediction model using multinomial model equations.

Covariates for example woman: Maternal age 25 years, Hispanic, nulliparous, no diabetes, pre-pregnancy BMI = 30 kg/m<sup>2</sup>, blood pressure trajectory group 5 (Moderate-stable), neighborhood deprivation index Q1, no government health insurance, never smoker, rate of gestational weight gain up to 20 weeks gestational age = 0.5 kg per week.

Example Calculations:

$$x\beta_{earlyPE} = -9.4235 + 0.0245(25) + 0.3937 + 1.0544 + 0.0264(30) + 1.8512 + 0.3329(0.5) = -4.5533$$

$$x\beta_{latePE} = -6.7792 + 0.0232(25) + 1.2426 + 1.2426 + 0.0258(30) + 1.6362 + 0.1577(0.5) = -2.1304$$

$$x\beta_{GH} = -7.4698 + 0.0280(25) - 0.2474 + 0.9370 + 0.0391(30) + 2.5145 + 0.2973(0.5) = -2.2441$$

$$1 + \sum_{j=2}^M \exp(x\beta_j) = 1 + \exp(-4.5533) + \exp(-2.1304) + \exp(-2.2441) = 1.2354$$

$$\Pr(Y = \text{early PE}|X = x) = \frac{\exp(x\beta_{earlyPE})}{1 + \sum_{j=2}^M \exp(x\beta_j)} = \frac{\exp(-4.5533)}{1.2354} = 0.0085 = 0.85\%$$

$$\Pr(Y = \text{late PE}|X = x) = \frac{\exp(x\beta_{latePE})}{1 + \sum_{j=2}^M \exp(x\beta_j)} = \frac{\exp(-2.1304)}{1.2354} = 0.0962 = 9.62\%$$

$$\Pr(Y = \text{GH}|X = x) = \frac{\exp(x\beta_{GH})}{1 + \sum_{j=2}^M \exp(x\beta_j)} = \frac{\exp(-2.2441)}{1.2354} = 0.0858 = 8.58\%$$

Table S1. TRIPOD Checklist: Prediction Model Development

| Section/Topic                | Item | Checklist Item                                                                                                                                                                                        | Page         |
|------------------------------|------|-------------------------------------------------------------------------------------------------------------------------------------------------------------------------------------------------------|--------------|
| <b>Title and abstract</b>    |      |                                                                                                                                                                                                       |              |
| Title                        | 1    | Identify the study as developing and/or validating a multivariable prediction model, the target population, and the outcome to be predicted.                                                          | 1            |
| Abstract                     | 2    | Provide a summary of objectives, study design, setting, participants, sample size, predictors, outcome, statistical analysis, results, and conclusions.                                               | 2-3          |
| <b>Introduction</b>          |      |                                                                                                                                                                                                       |              |
| Background and objectives    | 3a   | Explain the medical context (including whether diagnostic or prognostic) and rationale for developing or validating the multivariable prediction model, including references to existing models.      | 6-7          |
|                              | 3b   | Specify the objectives, including whether the study describes the development or validation of the model or both.                                                                                     | 7            |
| <b>Methods</b>               |      |                                                                                                                                                                                                       |              |
| Source of data               | 4a   | Describe the study design or source of data (e.g., randomized trial, cohort, or registry data), separately for the development and validation data sets, if applicable.                               | 8-9          |
|                              | 4b   | Specify the key study dates, including start of accrual; end of accrual; and, if applicable, end of follow-up.                                                                                        | 8            |
| Participants                 | 5a   | Specify key elements of the study setting (e.g., primary care, secondary care, general population) including number and location of centres.                                                          | 8            |
|                              | 5b   | Describe eligibility criteria for participants.                                                                                                                                                       | 8-9          |
|                              | 5c   | Give details of treatments received, if relevant.                                                                                                                                                     | NA           |
| Outcome                      | 6a   | Clearly define the outcome that is predicted by the prediction model, including how and when assessed.                                                                                                | 10           |
|                              | 6b   | Report any actions to blind assessment of the outcome to be predicted.                                                                                                                                | NA           |
| Predictors                   | 7a   | Clearly define all predictors used in developing or validating the multivariable prediction model, including how and when they were measured.                                                         | 9-11         |
|                              | 7b   | Report any actions to blind assessment of predictors for the outcome and other predictors.                                                                                                            | NA           |
| Sample size                  | 8    | Explain how the study size was arrived at.                                                                                                                                                            | 9            |
| Missing data                 | 9    | Describe how missing data were handled (e.g., complete-case analysis, single imputation, multiple imputation) with details of any imputation method.                                                  | 31           |
| Statistical analysis methods | 10a  | Describe how predictors were handled in the analyses.                                                                                                                                                 | 11-13        |
|                              | 10b  | Specify type of model, all model-building procedures (including any predictor selection), and method for internal validation.                                                                         | 11-13        |
|                              | 10d  | Specify all measures used to assess model performance and, if relevant, to compare multiple models.                                                                                                   | 12           |
| Risk groups                  | 11   | Provide details on how risk groups were created, if done.                                                                                                                                             | 9-10         |
| <b>Results</b>               |      |                                                                                                                                                                                                       |              |
| Participants                 | 13a  | Describe the flow of participants through the study, including the number of participants with and without the outcome and, if applicable, a summary of the follow-up time. A diagram may be helpful. | 34, 28-29    |
|                              | 13b  | Describe the characteristics of the participants (basic demographics, clinical features, available predictors), including the number of participants with missing data for predictors and outcome.    | 13, 34       |
| Model development            | 14a  | Specify the number of participants and outcome events in each analysis.                                                                                                                               | 34, 30-31    |
|                              | 14b  | If done, report the unadjusted association between each candidate predictor and outcome.                                                                                                              | 32           |
| Model specification          | 15a  | Present the full prediction model to allow predictions for individuals (i.e., all regression coefficients, and model intercept or baseline survival at a given time point).                           | 32           |
|                              | 15b  | Explain how to use the prediction model.                                                                                                                                                              | 21           |
| Model performance            | 16   | Report performance measures (with CIs) for the prediction model.                                                                                                                                      | 32           |
| <b>Discussion</b>            |      |                                                                                                                                                                                                       |              |
| Limitations                  | 18   | Discuss any limitations of the study (such as nonrepresentative sample, few events per predictor, missing data).                                                                                      | 20-21        |
| Interpretation               | 19b  | Give an overall interpretation of the results, considering objectives, limitations, and results from similar studies, and other relevant evidence.                                                    | 21-22        |
| Implications                 | 20   | Discuss the potential clinical use of the model and implications for future research.                                                                                                                 | 4, 21        |
| <b>Other information</b>     |      |                                                                                                                                                                                                       |              |
| Supplementary information    | 21   | Provide information about the availability of supplementary resources, such as study protocol, Web calculator, and data sets.                                                                         | Supplmt file |
| Funding                      | 22   | Give the source of funding and the role of the funders for the present study.                                                                                                                         | 22           |

We recommend using the TRIPOD Checklist in conjunction with the TRIPOD Explanation and Elaboration document.

**Table S2. Maternal Characteristics in the Model Development Dataset (N=174,925 and the Internal Independent Validation Dataset (N=74,967) for One Singleton Live or Still Birth per Individual Among Low-to-Moderate Risk Women (2009-2019).**

| Characteristics                                                     | Total Sample<br>N=249,892 | Model-<br>Development<br>N=174,925 | Model<br>Validation<br>N=74,967 | P-value |
|---------------------------------------------------------------------|---------------------------|------------------------------------|---------------------------------|---------|
| Mean (SD) or n (%)                                                  |                           |                                    |                                 |         |
| Maternal age, y, mean (SD)                                          | 30.9 (5.3)                | 30.9 (5.3)                         | 31.0 (5.3)                      | 0.12    |
| Age categories, n (%)                                               |                           |                                    |                                 | 0.11    |
| 18-25 y                                                             | 45752 (18)                | 32163 (18)                         | 13589 (18)                      |         |
| 26-30 y                                                             | 77836 (31)                | 54617 (31)                         | 23219 (31)                      |         |
| 31-35 y                                                             | 83341 (33)                | 58060 (33)                         | 25281 (34)                      |         |
| 36-40 y                                                             | 36466 (15)                | 25541 (15)                         | 10925 (15)                      |         |
| 41-45 y                                                             | 6497 (3)                  | 4544 (3)                           | 1953 (3)                        |         |
| Racial and ethnic groups, n (%)                                     |                           |                                    |                                 | 0.40    |
| Asian                                                               | 63410 (25)                | 44216 (25)                         | 19194 (26)                      |         |
| Black                                                               | 18066 (7)                 | 12708 (7)                          | 5358 (7)                        |         |
| Hispanic                                                            | 66003 (26)                | 46289 (26)                         | 19714 (26)                      |         |
| White                                                               | 91329 (37)                | 63927 (37)                         | 27402 (37)                      |         |
| Mixed/Native/unknown                                                | 11084 (4)                 | 7785 (4)                           | 3299 (4)                        |         |
| Prenatal parity, n (%)                                              |                           |                                    |                                 | 0.19    |
| Nulliparous (0 prior births)                                        | 142872 (57)               | 99972 (57)                         | 42900 (57)                      |         |
| Primiparous (1 prior birth)                                         | 67194 (27)                | 47215 (27)                         | 19979 (27)                      |         |
| Biparous (2 prior births)                                           | 27225 (11)                | 18947 (11)                         | 8278 (11)                       |         |
| Multiparous (3 or more prior birth)                                 | 12601 (5)                 | 8791 (5)                           | 3810 (5)                        |         |
| Gestational age at first prenatal care visit,<br>(weeks), mean (SD) | 8.2 (2.0)                 | 8.2 (2.0)                          | 8.2 (2.0)                       | 0.28    |
| Diabetes, Pregestational, n (%)                                     | 1558 (1)                  | 1078 (1)                           | 480 (1)                         | 0.48    |
| Prepregnancy weight, (kg), mean (SD)                                | 68.9 (16.6)               | 68.9 (16.6)                        | 68.8 (16.5)                     | 0.06    |
| Height, (cm), mean (SD)                                             | 162.5 (7.0)               | 162.5 (7.0)                        | 162.5 (7.0)                     | 0.26    |
| Prepregnancy BMI, kg/m <sup>2</sup> , mean (SD)                     | 26.0 (5.8)                | 26.0 (5.8)                         | 26.0 (5.8)                      | 0.11    |
| Prepregnancy BMI Categories, n (%)                                  |                           |                                    |                                 | 0.24    |
| Underweight (<18.5)                                                 | 6761 (3)                  | 4666 (3)                           | 2095 (3)                        |         |
| Normal weight (18.5-24.9)                                           | 123198 (50)               | 86172 (50)                         | 37026 (50)                      |         |
| Overweight (25-29.9)                                                | 67231 (27)                | 47046 (27)                         | 20185 (27)                      |         |
| Obesity class I (30-34.9)                                           | 30564 (12)                | 21515 (12)                         | 9049 (12)                       |         |
| Obesity class II (35-39.9)                                          | 12882 (5)                 | 9020 (5)                           | 3862 (5)                        |         |
| Obesity class III (≥40)                                             | 7435 (3)                  | 5248 (3)                           | 2187 (3)                        |         |
| <u>Social Factors</u>                                               |                           |                                    |                                 |         |
| Government health insurance, n (%)                                  | 18401 (7)                 | 12881 (7)                          | 5520 (7)                        | 1.00    |
| Neighborhood deprivation index, n (%)                               |                           |                                    |                                 | 0.14    |
| Q1 ≤-1 (least deprived)                                             | 28723 (12)                | 20135 (12)                         | 8588 (11)                       |         |
| Q2 >-1 and ≤0                                                       | 125947 (50)               | 87984 (50)                         | 37963 (51)                      |         |
| Q3 >0 and ≤1                                                        | 64742 (26)                | 45318 (26)                         | 19424 (26)                      |         |
| Q4 >1 (most deprived)                                               | 30076 (12)                | 21214 (12)                         | 8862 (12)                       |         |

**Table S2, Continued:**

| <u>Lifestyle Behaviors</u>                                                 |             |             |            |      |
|----------------------------------------------------------------------------|-------------|-------------|------------|------|
| Smoking status, n (%)                                                      |             |             |            | 0.60 |
| Current                                                                    | 14087 (6)   | 9918 (6)    | 4169 (6)   |      |
| Former                                                                     | 30409 (12)  | 21300 (12)  | 9109 (12)  |      |
| Never                                                                      | 204169 (82) | 142836 (82) | 61333 (82) |      |
| Unknown                                                                    | 1227 (0)    | 871 (0)     | 356 (0)    |      |
| Total gestational weight gain, (kg), mean (SD)                             | 13.5 (6.5)  | 13.5 (6.5)  | 13.5 (6.4) | 0.18 |
| Rate of gestational weight gain $\leq$ 20 weeks GA, (kg per wk), mean (SD) | 0.2 (0.2)   | 0.2 (0.2)   | 0.2 (0.2)  | 0.67 |
| <u>Early pregnancy BP trajectory groups, n (%)</u>                         |             |             |            |      |
| Elevated-stable                                                            | 17284 (7)   | 12068 (7)   | 5216 (7)   |      |
| Moderate-stable                                                            | 63550 (25)  | 44738 (26)  | 18812 (25) |      |
| Low-increasing                                                             | 48066 (19)  | 33579 (19)  | 14487 (19) |      |
| Moderate-fast-decline                                                      | 25288 (10)  | 17639 (10)  | 7649 (10)  |      |
| Low-declining                                                              | 80356 (32)  | 56079 (32)  | 24277 (32) |      |
| Ultra-low-declining                                                        | 15348 (6)   | 10822 (6)   | 4526 (6)   |      |
| No. of BP measurements up to 20 weeks GA, mean (SD)                        | 4.1 (1.7)   | 4.1 (1.7)   | 4.1 (1.7)  | 0.70 |
| Delivery gestational age, (weeks), mean (SD)                               | 39.2 (2.0)  | 39.2 (2.0)  | 39.3 (2.0) | 0.90 |

BMI, body mass index; BP, blood pressure; GA, gestational age; SD, standard deviation.

**Table S3. Predictive Model Performance for Hypertensive Disorders of Pregnancy Among Low-to-Moderate Risk Women Utilizing Six Early Pregnancy Blood Pressure Trajectory Groups, Standard Risk Factors, Lifestyle Behaviors, and Social Factors (Model 3.3) and With the Addition of Interaction Terms for Pre-pregnancy BMI, Parity, Racial and Ethnic Groups (Model 3.4), or Group Probabilities for BPT Groups (Model 3.5). C-statistics (95%CI) N=74,967 validation dataset.**

| Model number                                                                                                                                                                                                                                                                                                                                                                                                                                                                                                                                                                                                                                                                                                                                                                                                                                                                                                                                      | Predictive Model Variables                                                                                                                                                                                        | Prediction Model C-statistics (95%CI) |                                     |                          |
|---------------------------------------------------------------------------------------------------------------------------------------------------------------------------------------------------------------------------------------------------------------------------------------------------------------------------------------------------------------------------------------------------------------------------------------------------------------------------------------------------------------------------------------------------------------------------------------------------------------------------------------------------------------------------------------------------------------------------------------------------------------------------------------------------------------------------------------------------------------------------------------------------------------------------------------------------|-------------------------------------------------------------------------------------------------------------------------------------------------------------------------------------------------------------------|---------------------------------------|-------------------------------------|--------------------------|
|                                                                                                                                                                                                                                                                                                                                                                                                                                                                                                                                                                                                                                                                                                                                                                                                                                                                                                                                                   |                                                                                                                                                                                                                   | Early-onset Preeclampsia (<34 weeks)  | Late-onset Preeclampsia (≥34 weeks) | Gestational Hypertension |
| 3.3                                                                                                                                                                                                                                                                                                                                                                                                                                                                                                                                                                                                                                                                                                                                                                                                                                                                                                                                               | Six BPT groups + Standard Risk Factors (BMI + Parity + Age + Race/ethnicity + Diabetes) + Lifestyle Behaviors + Social Factors                                                                                    | 0.747 (0.719-0.775)                   | 0.731 (0.723-0.740)                 | 0.770 (0.762-0.778)      |
| 3.4                                                                                                                                                                                                                                                                                                                                                                                                                                                                                                                                                                                                                                                                                                                                                                                                                                                                                                                                               | Six BPT groups + Standard Risk Factors (BMI + Parity + Age + Race/ethnicity + Diabetes) + Lifestyle Behaviors + Social Factors + <b>Interaction terms</b> for pre-pregnancy BMI, parity, and racial/ethnic groups | 0.748 (0.721-0.776)                   | 0.731 (0.723-0.740)                 | 0.770 (0.762-0.778)      |
| 3.5                                                                                                                                                                                                                                                                                                                                                                                                                                                                                                                                                                                                                                                                                                                                                                                                                                                                                                                                               | Six BPT groups + Standard Risk Factors (BMI + Parity + Age + Race/ethnicity + Diabetes) + Lifestyle Behaviors + Social Factors + <b>Group probabilities</b> for BPT groups                                        | 0.755 (0.728-0.782)                   | 0.735 (0.727-0.744)                 | 0.777 (0.769-0.784)      |
| <p><b>Abbreviations:</b> BP, blood pressure; BMI, pre-pregnancy body mass index; BPT, blood pressure trajectory</p> <p><b>Standard Risk factors:</b> Pre-pregnancy BMI (kg/m<sup>2</sup>), parity (0 vs ≥1), maternal age (years), racial and ethnic groups [Black, Hispanic, Asian, White (referent), Mixed/Native/unknown], and pregestational diabetes;</p> <p><b>Lifestyle Behaviors:</b> Smoking during pregnancy, and Rate of gestational weight gain (GWG) ≤ 20 weeks' gestation (kg per week).</p> <p><b>Social Factors:</b> Government health insurance and Neighborhood deprivation index</p> <p><b>C-statistics for Model 1:</b> Six BPT + Standard Risk factors, <b>Model 2:</b> Six BPT + Standard Risk Factors + Interaction terms for pre-pregnancy BMI, parity and racial and ethnic groups, <b>Model 3:</b> Six BPT groups + Standard Risk Factors, Lifestyle Behaviors and Social Factors + <b>BPT Group probabilities.</b></p> |                                                                                                                                                                                                                   |                                       |                                     |                          |

**Table S4. Model coefficients for predicting risk of Early-onset Preeclampsia, Later-onset Preeclampsia, Gestational Hypertension, and No HDP Outcomes for the Model-Development (N=174,925) Dataset; Singleton Gestations, One Live or Still Birth per Individual Among Women at Low-to-Moderate Risk (2009-2019).**

| Covariate                                                               | Early-onset Preeclampsia | Later-onset Preeclampsia | Gestational Hypertension | No HDP (ref) |
|-------------------------------------------------------------------------|--------------------------|--------------------------|--------------------------|--------------|
| Intercept                                                               | -9.4235                  | -6.7792                  | -7.4698                  | 0            |
| Maternal age, years                                                     | 0.0245                   | 0.0232                   | 0.0280                   | 0            |
| Race and ethnicity,                                                     |                          |                          |                          |              |
| Asian                                                                   | 0.4476                   | 0.1906                   | -0.0710                  | 0            |
| Black                                                                   | 0.7735                   | 0.3397                   | -0.1155                  | 0            |
| Hispanic                                                                | 0.3937                   | 0.3372                   | -0.2474                  | 0            |
| Mixed/Native/unknown                                                    | 0.1360                   | 0.1795                   | -0.0350                  | 0            |
| White (referent)                                                        | 0                        | 0                        | 0                        | 0            |
| Prenatal parity                                                         |                          |                          |                          |              |
| Nulliparous                                                             | 1.0544                   | 1.2426                   | 0.9370                   | 0            |
| Parous (referent)                                                       | 0                        | 0                        | 0                        | 0            |
| Diabetes, pregestational                                                | 1.4863                   | 0.9916                   | 0.2530                   | 0            |
| Pre-pregnancy BMI, kg/m <sup>2</sup>                                    | 0.0264                   | 0.0258                   | 0.0391                   | 0            |
| Blood Pressure Trajectory Group                                         |                          |                          |                          |              |
| 1 Ultra-low-declining (referent)                                        |                          |                          |                          |              |
| 2 Low-declining                                                         | 0.6249                   | 0.5791                   | 0.9134                   | 0            |
| 3 Moderate-fast-decline                                                 | 0.8477                   | 1.0349                   | 1.6163                   | 0            |
| 4 Low-increasing                                                        | 1.3952                   | 1.1222                   | 1.7583                   | 0            |
| 5 Moderate-stable                                                       | 1.8512                   | 1.6362                   | 2.5145                   | 0            |
| 6 Elevated-stable                                                       | 2.5250                   | 2.1835                   | 3.2699                   | 0            |
| <i><u>Social Factors</u></i>                                            |                          |                          |                          |              |
| Neighborhood deprivation index (NDI)                                    |                          |                          |                          |              |
| Q1 (least deprived, referent)                                           | 0                        | 0                        | 0                        | 0            |
| Q2                                                                      | 0.0609                   | 0.0292                   | -0.0468                  | 0            |
| Q3                                                                      | 0.0992                   | 0.0509                   | -0.0780                  | 0            |
| Q4 (most deprived)                                                      | 0.1452                   | 0.0989                   | -0.0608                  | 0            |
| Government health insurance                                             | -0.0165                  | 0.1812                   | 0.1849                   | 0            |
| <i><u>Lifestyle Behaviors</u></i>                                       |                          |                          |                          |              |
| Smoking status, n (%)                                                   |                          |                          |                          |              |
| Current                                                                 | -0.0280                  | 0.0292                   | 0.0922                   | 0            |
| Former                                                                  | -0.1115                  | 0.0578                   | 0.1138                   | 0            |
| Never (ref)                                                             | 0                        | 0                        | 0                        | 0            |
| Rate of gestational weight gain up to 20 weeks' gestation (kg per week) | 0.3329                   | 0.1577                   | 0.2973                   | 0            |

HDP, hypertensive disorders of pregnancy; BMI, body mass index; SD, standard deviation. Early-onset Preeclampsia is a diagnosis <34 weeks' gestational age; Later-onset Preeclampsia is a diagnosis ≥34 weeks' gestational age



**Table S5. Models for Early Pregnancy Blood Pressure Trajectory Groups Plus Risk Factors Stratified by the Number of Moderate Risk Factors and Diabetes: Average Predicted Probabilities (n, %) and the Observed Incidence Rate (n, % and 95% Confidence Intervals) of Preeclampsia and Gestational Hypertension within the Internal Validation Sample (n=74,274) of Low-to-Moderate Risk Women. USPSTF Moderate Risk Factors = Black race, Obesity, Nulliparity, Age ≥35 years, Low income/Government insurance, or Pregestational Diabetes**

| BP Trajectory Groups                         | N (col %)<br>women | Pre-<br>eclampsia<br>n | Average<br>Predicted<br>% | Observed %<br>(95% CI) | Gestational<br>Hypertension<br>n | Average<br>Predicted<br>% | Observed %<br>(95% CI) |
|----------------------------------------------|--------------------|------------------------|---------------------------|------------------------|----------------------------------|---------------------------|------------------------|
| <b>No Risk Factors (N=12,390).</b>           |                    |                        |                           |                        |                                  |                           |                        |
| Elevated-stable                              | 380 (3.1)          | 17                     | 4.7                       | 4.5 (2.6-7.1)          | 36                               | 8.1                       | 9.5 (6.7-12.9)         |
| Moderate-stable                              | 2,243 (18.1)       | 61                     | 2.9                       | 2.7 (2.1-3.5)          | 86                               | 3.9                       | 3.8 (3.1-4.7)          |
| Low-increasing                               | 2,277 (18.4)       | 33                     | 1.8                       | 1.4 (1.0-2.0)          | 35                               | 1.8                       | 1.5 (1.1-2.1)          |
| Moderate-fast-decline                        | 1,217 (9.8)        | 20                     | 1.6                       | 1.6 (1.0-2.5)          | 12                               | 1.6                       | 1.0 (0.5-1.7)          |
| Low-declining                                | 5,176 (41.8)       | 43                     | 1.0                       | 0.8 (0.6-1.1)          | 44                               | 0.8                       | 0.9 (0.6-1.1)          |
| Ultra-low-declining                          | 1,097 (8.9)        | 9                      | 0.6                       | 0.8 (0.4-1.6)          | 4                                | 0.3                       | 0.4 (0.1-0.9)          |
| <b>Overall</b>                               | <b>12,390</b>      | <b>183</b>             | <b>1.6</b>                | <b>1.5 (1.3-1.7)</b>   | <b>217</b>                       | <b>1.8</b>                | <b>1.8 (1.5-2.0)</b>   |
| <b>One Risk Factor (N=36,684).</b>           |                    |                        |                           |                        |                                  |                           |                        |
| Elevated-stable                              | 2,129 (5.0)        | 203                    | 10.0                      | 9.5(8.3-10.9)          | 332                              | 14.0                      | 15.6(14.1-17.2)        |
| Moderate-stable                              | 8,499 (23.2)       | 512                    | 6.6                       | 6.0 (5.5-6.6)          | 640                              | 7.2                       | 7.5 (7.0-8.1)          |
| Low-increasing                               | 7,136 (19.5)       | 280                    | 4.2                       | 3.9 (3.5-4.4)          | 243                              | 3.5                       | 3.4 (3.0-3.9)          |
| Moderate-fast-decline                        | 3,822 (10.4)       | 119                    | 3.8                       | 3.1 (2.6-3.7)          | 119                              | 3.0                       | 3.1 (2.6-3.7)          |
| Low-declining                                | 12,663 (34.5)      | 285                    | 2.5                       | 2.3 (2.0-2.5)          | 204                              | 1.5                       | 1.6 (1.4-1.8)          |
| Ultra-low-declining                          | 2,435 (6.6)        | 32                     | 1.4                       | 1.3 (0.9-1.9)          | 15                               | 0.6                       | 0.6 (0.3-1.0)          |
| <b>Overall</b>                               | <b>36,684</b>      | <b>1,431</b>           | <b>4.3</b>                | <b>3.9 (3.7-4.1)</b>   | <b>1553</b>                      | <b>4.0</b>                | <b>4.2 (4.0-4.4)</b>   |
| <b>Two Risk Factors (N=19,029).</b>          |                    |                        |                           |                        |                                  |                           |                        |
| Elevated-stable                              | 1,765 (9.3)        | 216                    | 12.8                      | 12.2(10.7-13.9)        | 300                              | 17.6                      | 17.0(15.3-18.8)        |
| Moderate-stable                              | 5,582 (29.3)       | 466                    | 8.4                       | 8.3 (7.6-9.1)          | 540                              | 9.1                       | 9.7 (8.9-10.5)         |
| Low-increasing                               | 3,760 (19.8)       | 239                    | 5.5                       | 6.4 (5.6-7.2)          | 174                              | 4.4                       | 4.6 (4.0-5.3)          |
| Moderate-fast-decline                        | 1,964 (10.3)       | 113                    | 4.8                       | 5.8 (4.8-6.9)          | 92                               | 3.8                       | 4.7 (3.8-5.7)          |
| Low-declining                                | 5,118 (26.9)       | 207                    | 3.2                       | 4.0 (3.5-4.6)          | 95                               | 1.9                       | 1.9 (1.5-2.3)          |
| Ultra-low-declining                          | 840 (4.4%)         | 12                     | 1.9                       | 1.4 (0.7-2.5)          | 7                                | 0.7                       | 0.8 (0.3-1.7)          |
| <b>Overall</b>                               | <b>19,029</b>      | <b>1,253</b>           | <b>6.2</b>                | <b>6.6 (6.2-6.9)</b>   | <b>1208</b>                      | <b>6.1</b>                | <b>6.3 (6.0-6.7)</b>   |
| <b>More than Two Risk Factors (N=6,171).</b> |                    |                        |                           |                        |                                  |                           |                        |
| Elevated-stable                              | 880 (14.3)         | 153                    | 16.1                      | 17.4(14.9-20.1)        | 166                              | 19.5                      | 18.9(16.3-21.6)        |
| Moderate-stable                              | 2,306 (37.4)       | 274                    | 10.9                      | 11.9(10.6-13.3)        | 238                              | 10.3%                     | 10.3 (9.1-11.6)        |
| Low-increasing                               | 1,180 (19.1)       | 91                     | 7.0                       | 7.7 (6.3-9.4)          | 68                               | 5.0%                      | 5.8 (4.5-7.2)          |
| Moderate-fast-decline                        | 612 (9.9)          | 32                     | 6.2                       | 5.2 (3.6-7.3)          | 24                               | 4.3%                      | 3.9 (2.5-5.8)          |
| Low-declining                                | 1,068 (17.3)       | 49                     | 3.8                       | 4.6 (3.4-6.0)          | 34                               | 2.0%                      | 3.2 (2.2-4.4)          |
| Ultra-low-declining                          | 125 (2.0)          | 4                      | 2.1                       | 3.2 (0.9-8.0)          | 2                                | 0.7%                      | 1.6 (0.2-5.7)          |
| <b>Overall</b>                               | <b>6,171</b>       | <b>603</b>             | <b>9.0</b>                | <b>9.8 (9.0-10.5)</b>  | <b>532</b>                       | <b>8.4%</b>               | <b>8.6 (7.9-9.3)</b>   |

Note: n = 693 women excluded from the model due to missing covariates; pre-pregnancy BMI, NDI, or rate of gestational weight gain up to 20 weeks' gestation.

**Table S6. Models for Early Pregnancy Blood Pressure Trajectory Groups Plus Risk Factors Stratified by Racial and Ethnic Groups: Average Predicted Probabilities (n, %) and the Observed Incidence Rate (n, % and 95% Confidence Intervals) of Preeclampsia and Gestational Hypertension within the Internal Validation Sample (n=74,274) of Low-to-Moderate Risk Women. USPSTF Moderate Risk Factors = Black race, Obesity, Nulliparity, Age ≥35 years, Low income/Government insurance, or Pregestational Diabetes**

| BP Trajectory Groups                                             | N (col %)<br>women | Pre-<br>eclampsia<br>n | Average<br>Predicted<br>% | Observed %<br>(95% CI) | Gestational<br>Hypertension<br>n | Average<br>Predicted<br>% | Observed %<br>(95% CI) |
|------------------------------------------------------------------|--------------------|------------------------|---------------------------|------------------------|----------------------------------|---------------------------|------------------------|
| <b>Black (N=5,307) with or without moderate risk factors</b>     |                    |                        |                           |                        |                                  |                           |                        |
| Elevated-stable                                                  | 552 (10.4)         | 65                     | 13.9                      | 11.8 (9.2-14.8)        | 85                               | 15.1                      | 15.4(12.5-18.7)        |
| Moderate-stable                                                  | 1,721 (32.4)       | 137                    | 8.6                       | 8.0 (6.7-9.3)          | 128                              | 7.5                       | 7.4 (6.2-8.8)          |
| Low-increasing                                                   | 1,129 (21.3)       | 64                     | 5.3                       | 5.7 (4.4-7.2)          | 46                               | 3.5                       | 4.1 (3.0-5.4)          |
| Moderate-fast-decline                                            | 557 (10.5)         | 29                     | 4.5                       | 5.2 (3.5-7.4)          | 11                               | 2.9                       | 2.0 (1.0-3.5)          |
| Low-declining                                                    | 1,203 (22.7)       | 41                     | 2.7                       | 3.4 (2.5-4.6)          | 28                               | 1.3                       | 2.3 (1.6-3.3)          |
| Ultra-low-declining                                              | 145 (2.7)          | 3                      | 1.6                       | 2.1 (0.4-5.9)          | 2                                | 0.5                       | 1.4 (0.2-4.9)          |
| <b>Overall</b>                                                   | 5,307              | 339                    | 6.5                       | 6.4 (5.7-7.1)          | 300                              | 5.4                       | 5.7 (5.0-6.3)          |
| <b>Hispanic (N=19,516) with or without moderate risk factors</b> |                    |                        |                           |                        |                                  |                           |                        |
| Elevated-stable                                                  | 1,257 (6.4)        | 155                    | 13.3                      | 12.3(10.6-14.3)        | 170                              | 13.0                      | 13.5(11.7-15.5)        |
| Moderate-stable                                                  | 4,881 (25.0)       | 379                    | 8.2                       | 7.8 (7.0-8.6)          | 342                              | 6.4                       | 7.0 (6.3-7.8)          |
| Low-increasing                                                   | 3,898 (20.0)       | 191                    | 4.8                       | 4.9 (4.2-5.6)          | 109                              | 2.9                       | 2.8 (2.3-3.4)          |
| Moderate-fast-decline                                            | 2,142 (11.0)       | 80                     | 4.2                       | 3.7 (3.0-4.6)          | 51                               | 2.5                       | 2.4 (1.8-3.1)          |
| Low-declining                                                    | 6,295 (32.3)       | 164                    | 2.5                       | 2.6 (2.2-3.0)          | 85                               | 1.1                       | 1.4 (1.1-1.7)          |
| Ultra-low-declining                                              | 1,043 (5.3)        | 12                     | 1.3                       | 1.2 (0.6-2.0)          | 5                                | 0.4                       | 0.5 (0.2-1.1)          |
| <b>Overall</b>                                                   | 19,516             | 981                    | 5.2                       | 5.0 (4.7-5.3)          | 762                              | 3.7                       | 3.9 (3.6-4.2)          |
| <b>Asian (N=19,018) with or without moderate risk factors</b>    |                    |                        |                           |                        |                                  |                           |                        |
| Elevated-stable                                                  | 763 (4.0)          | 95                     | 11.9                      | 12.5(10.2-15.0)        | 125                              | 15.1                      | 16.4(13.8-19.2)        |
| Moderate-stable                                                  | 3,466 (18.2)       | 265                    | 7.4                       | 7.6 (6.8-8.6)          | 264                              | 7.5                       | 7.6 (6.8-8.6)          |
| Low-increasing                                                   | 3,245 (17.1)       | 160                    | 4.6                       | 4.9 (4.2-5.7)          | 96                               | 3.6                       | 3.0 (2.4-3.6)          |
| Moderate-fast-decline                                            | 1,617 (8.5)        | 64                     | 4.0                       | 4.0 (3.1-5.0)          | 54                               | 3.1                       | 3.3 (2.5-4.3)          |
| Low-declining                                                    | 7,769 (40.9)       | 182                    | 2.5                       | 2.3 (2.0-2.7)          | 97                               | 1.5                       | 1.2 (1.0-1.5)          |
| Ultra-low-declining                                              | 2,158 (11.3)       | 31                     | 1.3                       | 1.4 (1.0-2.0)          | 14                               | 0.6                       | 0.6 (0.4-1.1)          |
| <b>Overall</b>                                                   | 19,018             | 797                    | 4.1                       | 4.2 (3.9-4.5)          | 650                              | 3.5                       | 3.4 (3.2-3.7)          |
| <b>White (N=27,167) with or without moderate risk factors</b>    |                    |                        |                           |                        |                                  |                           |                        |
| Elevated-stable                                                  | 2,370 (8.7)        | 251                    | 10.1                      | 10.6 (9.4-11.9)        | 418                              | 17.5                      | 17.6(16.1-19.2)        |
| Moderate-stable                                                  | 7,728 (28.4)       | 478                    | 6.3                       | 6.2 (5.7-6.7)          | 692                              | 8.8                       | 9.0 (8.3-9.6)          |
| Low-increasing                                                   | 5,438 (20.0)       | 201                    | 3.8                       | 3.7 (3.2-4.2)          | 238                              | 4.1                       | 4.4 (3.8-5.0)          |
| Moderate-fast-decline                                            | 2,962 (10.9)       | 102                    | 3.4                       | 3.4 (2.8-4.2)          | 118                              | 3.6                       | 4.0 (3.3-4.8)          |
| Low-declining                                                    | 7,729 (28.4)       | 179                    | 2.1                       | 2.3 (2.0-2.7)          | 145                              | 1.7                       | 1.9 (1.6-2.2)          |
| Ultra-low-declining                                              | 940 (3.5)          | 9                      | 1.1                       | 1.0 (0.4-1.8)          | 6                                | 0.6                       | 0.6 (0.2-1.4)          |
| <b>Overall</b>                                                   | 27,167             | 1,220                  | 4.4                       | 4.5 (4.2-4.7)          | 1617                             | 5.7                       | 6.0 (5.7-6.2)          |

**Table S7. Models for Early Pregnancy Blood Pressure Trajectory Groups Plus Risk Factors Stratified by Parity: Average Predicted Probabilities (n, %) and the Observed Incidence Rate (n, % and 95% Confidence Intervals) of Preeclampsia and Gestational Hypertension within the Internal Validation Sample (n=74,274) of Low-to-Moderate Risk Women. USPSTF Moderate Risk Factors = Black race, Obesity, Nulliparity, Age ≥35 years, Low income/Government insurance, or Pregestational Diabetes**

| BP Trajectory Groups                                        | N (col %)<br>women | Pre-<br>eclampsia<br>n | Average<br>Predicted<br>% | Observed %<br>(95% CI) | Gestational<br>Hypertensio<br>n n | Average<br>Predicted<br>% | Observed %<br>(95% CI) |
|-------------------------------------------------------------|--------------------|------------------------|---------------------------|------------------------|-----------------------------------|---------------------------|------------------------|
| <b>All Parous (N=31,691)</b>                                |                    |                        |                           |                        |                                   |                           |                        |
| Elevated-stable                                             | 1,790 (5.6)        | 133                    | 6.4                       | 7.4 (6.3-8.7)          | 223                               | 10.5                      | 12.5(11.0-14.1)        |
| Moderate-stable                                             | 7,223 (22.8)       | 266                    | 3.7                       | 3.7 (3.3-4.1)          | 350                               | 4.8                       | 4.8 (4.4-5.4)          |
| Low-increasing                                              | 6,050 (19.1)       | 113                    | 2.2                       | 1.9 (1.5-2.2)          | 125                               | 2.2                       | 2.1 (1.7-2.5)          |
| Moderate-fast-decline                                       | 3,233 (10.2)       | 62                     | 1.9                       | 1.9 (1.5-2.5)          | 52                                | 1.9                       | 1.6 (1.2-2.1)          |
| Low-declining                                               | 11,195 (35.3)      | 119                    | 1.2                       | 1.1 (0.9-1.3)          | 110                               | 0.9                       | 1.0 (0.8-1.2)          |
| Ultra-low-declining                                         | 2,200 (6.9)        | 15                     | 0.6                       | 0.7 (0.4-1.1)          | 7                                 | 0.3                       | 0.3 (0.1-0.7)          |
| <b>Overall</b>                                              | <b>31,691</b>      | <b>708</b>             | <b>2.3</b>                | <b>2.2 (2.1-2.4)</b>   | <b>867</b>                        | <b>2.6</b>                | <b>2.7 (2.6-2.9)</b>   |
| <b>Parous with No Risk Factors (N=12,390); All Low Risk</b> |                    |                        |                           |                        |                                   |                           |                        |
| Elevated-stable                                             | 380 (3.1)          | 17                     | 4.7                       | 4.5 (2.6-7.1)          | 36                                | 8.1                       | 9.5 (6.7-12.9)         |
| Moderate-stable                                             | 2,243 (18.1)       | 61                     | 2.9                       | 2.7 (2.1-3.5)          | 86                                | 3.9                       | 3.8 (3.1-4.7)          |
| Low-increasing                                              | 2,277 (18.4)       | 33                     | 1.8                       | 1.4 (1.0-2.0)          | 35                                | 1.8                       | 1.5 (1.1-2.1)          |
| Moderate-fast-decline                                       | 1,217 (9.8)        | 20                     | 1.6                       | 1.6 (1.0-2.5)          | 12                                | 1.6                       | 1.0 (0.5-1.7)          |
| Low-declining                                               | 5,176 (41.8)       | 43                     | 1.0                       | 0.8 (0.6-1.1)          | 44                                | 0.8                       | 0.9 (0.6-1.1)          |
| Ultra-low-declining                                         | 1,097 (8.9)        | 9                      | 0.6                       | 0.8 (0.4-1.6)          | 4                                 | 0.3                       | 0.4 (0.1-0.9)          |
| <b>Overall</b>                                              | <b>12,390</b>      | <b>183</b>             | <b>1.6</b>                | <b>1.5 (1.3-1.7)</b>   | <b>217</b>                        | <b>1.8</b>                | <b>1.8 (1.5-2.0)</b>   |
| <b>All Nulliparas (N=42,583)</b>                            |                    |                        |                           |                        |                                   |                           |                        |
| Elevated-stable                                             | 3,364 (7.9)        | 456                    | 14.4                      | 13.6(12.4-14.8)        | 611                               | 18.5                      | 18.2(16.9-19.5)        |
| Moderate-stable                                             | 11,407 (26.8)      | 1,047                  | 9.5                       | 9.2 (8.7-9.7)          | 1154                              | 9.6                       | 10.1 (9.6-10.7)        |
| Low-increasing                                              | 8,303 (19.5)       | 530                    | 6.0                       | 6.4 (5.9-6.9)          | 395                               | 4.7                       | 4.8 (4.3-5.2)          |
| Moderate-fast-decline                                       | 4,382 (10.3)       | 222                    | 5.3                       | 5.1 (4.4-5.8)          | 195                               | 4.0                       | 4.5 (3.9-5.1)          |
| Low-declining                                               | 12,830 (30.1)      | 465                    | 3.4                       | 3.6 (3.3-4.0)          | 267                               | 1.9                       | 2.1 (1.8-2.3)          |
| Ultra-low-declining                                         | 2,297 (5.4)        | 42                     | 1.9                       | 1.8 (1.3-2.5)          | 21                                | 0.7                       | 0.9 (0.6-1.4)          |
| <b>Overall</b>                                              | <b>42,583</b>      | <b>2,762</b>           | <b>6.5</b>                | <b>6.5 (6.3-6.7)</b>   | <b>2643</b>                       | <b>6.0</b>                | <b>6.2 (6.0-6.4)</b>   |
| <b>Nulliparas with No Risk factors (N=23,803)</b>           |                    |                        |                           |                        |                                   |                           |                        |
| Elevated-stable                                             | 1,368 (5.7)        | 143                    | 12.3                      | 10.5 (8.9-12.2)        | 236                               | 16.1                      | 17.3(15.3-19.4)        |
| Moderate-stable                                             | 5,593 (23.5)       | 409                    | 8.2                       | 7.3 (6.6-8.0)          | 490                               | 8.5                       | 8.8 (8.0-9.5)          |
| Low-increasing                                              | 4,638 (19.5)       | 239                    | 5.3                       | 5.2 (4.5-5.8)          | 184                               | 4.2                       | 4.0 (3.4-4.6)          |
| Moderate-fast-decline                                       | 2,490 (10.5)       | 101                    | 4.7                       | 4.1 (3.3-4.9)          | 99                                | 3.6                       | 4.0 (3.2-4.8)          |
| Low-declining                                               | 8,180 (34.4)       | 238                    | 3.2                       | 2.9 (2.6-3.3)          | 155                               | 1.8                       | 1.9 (1.6-2.2)          |
| Ultra-low-declining                                         | 1,534 (6.4)        | 28                     | 1.8                       | 1.8 (1.2-2.6)          | 14                                | 0.7                       | 0.9 (0.5-1.5)          |
| <b>Overall</b>                                              | <b>23,803</b>      | <b>1,158</b>           | <b>5.4</b>                | <b>4.9 (4.6-5.1)</b>   | <b>1178</b>                       | <b>4.8</b>                | <b>4.9 (4.7-5.2)</b>   |

**Table S8. Models for Early Pregnancy Blood Pressure Trajectory Groups Plus Risk Factors Among Nulliparas with No Risk Factors Stratified by All Racial and Ethnic Groups: Average Predicted Probabilities (n, %) and the Observed Incidence Rate (n, % and 95% Confidence Intervals) of Preeclampsia and Gestational Hypertension within the Internal Validation Sample (n=74,274) of Low-to-Moderate Risk Women. USPSTF Moderate Risk Factors = Black race, Obesity, Nulliparity, Age ≥35 years, Low income/Government insurance, or Pregestational Diabetes**

| BP Trajectory Groups                                 | N (col %)<br>women | Pre-<br>eclampsia<br>n | Average<br>Predicted<br>% | Observed %<br>(95% CI) | Gestational<br>Hypertension<br>n | Average<br>Predicted<br>% | Observed %<br>(95% CI) |
|------------------------------------------------------|--------------------|------------------------|---------------------------|------------------------|----------------------------------|---------------------------|------------------------|
| <b>Black Nulliparas (N=1,190) No risk factors</b>    |                    |                        |                           |                        |                                  |                           |                        |
| Elevated-stable                                      | 85 (7.1)           | 7                      | 15.6                      | 8.2 (3.4-16.2)         | 13                               | 14.6                      | 15.3 (8.4-24.7)        |
| Moderate-stable                                      | 328 (27.6)         | 28                     | 10.2                      | 8.5 (5.7-12.1)         | 30                               | 7.8                       | 9.1 (6.3-12.8)         |
| Low-increasing                                       | 272 (22.9)         | 21                     | 6.4                       | 7.7 (4.8-11.6)         | 16                               | 3.8                       | 5.9 (3.4-9.4)          |
| Moderate-fast-decline                                | 123 (10.3)         | 12                     | 5.6                       | 9.8 (5.1-16.4)         | 3                                | 3.2                       | 2.4 (0.5-7.0)          |
| Low-declining                                        | 334 (28.1)         | 16                     | 3.7                       | 4.8 (2.8-7.7)          | 9                                | 1.6                       | 2.7 (1.2-5.1)          |
| Ultra-low-declining                                  | 48 (4.0)           | 1                      | 2.1                       | 2.1 (0.1-11.1)         | 1                                | 0.7                       | 2.1 (0.1-11.1)         |
| <b>Overall</b>                                       | <b>1,190</b>       | <b>85</b>              | <b>7.1</b>                | <b>7.1 (5.7-8.8)</b>   | <b>72</b>                        | <b>4.9</b>                | <b>6.1 (4.8-7.6)</b>   |
| <b>Hispanic Nulliparas (N=4,565) No risk factors</b> |                    |                        |                           |                        |                                  |                           |                        |
| Elevated-stable                                      | 222 (4.9)          | 36                     | 15.2                      | 16.2(11.6-21.7)        | 25                               | 12.9                      | 11.3 (7.4-16.2)        |
| Moderate-stable                                      | 1,076 (23.6)       | 79                     | 9.9                       | 7.3 (5.9-9.1)          | 88                               | 6.8                       | 8.2 (6.6-10.0)         |
| Low-increasing                                       | 921 (20.2)         | 63                     | 6.3                       | 6.8 (5.3-8.7)          | 35                               | 3.4                       | 3.8 (2.7-5.2)          |
| Moderate-fast-decline                                | 534 (11.7)         | 26                     | 5.7                       | 4.9 (3.2-7.1)          | 16                               | 2.9                       | 3.0 (1.7-4.8)          |
| Low-declining                                        | 1,562 (34.2)       | 61                     | 3.7                       | 3.9 (3.0-5.0)          | 22                               | 1.5                       | 1.4 (0.9-2.1)          |
| Ultra-low-declining                                  | 250 (5.5)          | 4                      | 2.1                       | 1.6 (0.4-4.0)          | 2                                | 0.6                       | 0.8 (0.1-2.9)          |
| <b>Overall</b>                                       | <b>4,565</b>       | <b>269</b>             | <b>6.4</b>                | <b>5.9 (5.2-6.6)</b>   | <b>188</b>                       | <b>3.8</b>                | <b>4.1 (3.6-4.7)</b>   |
| <b>Asian Nulliparas (N=7,682) No risk factors</b>    |                    |                        |                           |                        |                                  |                           |                        |
| Elevated-stable                                      | 267 (3.5)          | 28                     | 13.6                      | 10.5 (7.1-14.8)        | 36                               | 15.8                      | 13.5 (9.6-18.2)        |
| Moderate-stable                                      | 1,317 (17.1)       | 121                    | 8.9                       | 9.2 (7.7-10.9)         | 100                              | 8.4                       | 7.6 (6.2-9.2)          |
| Low-increasing                                       | 1,367 (17.8)       | 78                     | 5.7                       | 5.7 (4.5-7.1)          | 40                               | 4.2                       | 2.9 (2.1-4.0)          |
| Moderate-fast-decline                                | 645 (8.4)          | 29                     | 5.0                       | 4.5 (3.0-6.4)          | 25                               | 3.6                       | 3.9 (2.5-5.7)          |
| Low-declining                                        | 3,222 (41.9)       | 94                     | 3.3                       | 2.9 (2.4-3.6)          | 55                               | 1.8                       | 1.7 (1.3-2.2)          |
| Ultra-low-declining                                  | 864 (11.2)         | 17                     | 1.8                       | 2.0 (1.2-3.1)          | 9                                | 0.7                       | 1.0 (0.5-2.0)          |
| <b>Overall</b>                                       | <b>7,682</b>       | <b>367</b>             | <b>5.0</b>                | <b>4.8 (4.3-5.3)</b>   | <b>265</b>                       | <b>3.9</b>                | <b>3.4 (3.1-3.9)</b>   |
| <b>White Nulliparas (N=10,458) No risk factors</b>   |                    |                        |                           |                        |                                  |                           |                        |
| Elevated-stable                                      | 822 (7.9)          | 74                     | 11.0                      | 9.0 (7.1-11.2)         | 163                              | 17.1                      | 19.8(17.2-22.7)        |
| Moderate-stable                                      | 2,958 (28.3)       | 194                    | 7.2                       | 6.6 (5.7-7.5)          | 283                              | 9.1                       | 9.6 (8.5-10.7)         |
| Low-increasing                                       | 2,124 (20.3)       | 87                     | 4.7                       | 4.1 (3.3-5.0)          | 94                               | 4.6                       | 4.4 (3.6-5.4)          |
| Moderate-fast-decline                                | 1,203 (11.5)       | 42                     | 4.1                       | 3.5 (2.5-4.7)          | 53                               | 3.9                       | 4.4 (3.3-5.7)          |
| Low-declining                                        | 3,012 (28.8)       | 79                     | 2.7                       | 2.6 (2.1-3.3)          | 71                               | 2.0                       | 2.4 (1.8-3.0)          |
| Ultra-low-declining                                  | 339 (3.2)          | 6                      | 1.5                       | 1.8 (0.7-3.8)          | 3                                | 0.8                       | 0.9 (0.2-2.6)          |
| <b>Overall</b>                                       | <b>10,458</b>      | <b>482</b>             | <b>5.2</b>                | <b>4.6 (4.2-5.0)</b>   | <b>667</b>                       | <b>5.9</b>                | <b>6.4 (5.9-6.9)</b>   |

**Table S9. Models for Early Pregnancy Blood Pressure Trajectory Groups Plus Risk Factors for Combinations of Any Two Moderate Risk Factors: Average Predicted Probabilities (n, %) and the Observed Incidence Rate (n, % and 95% Confidence Intervals) of Preeclampsia and Gestational Hypertension within the Internal Validation Sample (n=74,274) of Low-to-Moderate Risk Women. USPSTF Moderate Risk Factors = Black race, Obesity, Nulliparity, Age ≥35 years, Low income/Government insurance, or Pregestational Diabetes**

| BP Trajectory Groups                                         | N (col %)<br>women | Pre-<br>eclampsia<br>n | Average<br>Predicted<br>% | Observed %<br>(95% CI) | Gestational<br>Hypertension<br>n | Average<br>Predicted<br>% | Observed %<br>(95% CI) |
|--------------------------------------------------------------|--------------------|------------------------|---------------------------|------------------------|----------------------------------|---------------------------|------------------------|
| <b>Nulliparity and Age ≥35 y (N=5,382)</b>                   |                    |                        |                           |                        |                                  |                           |                        |
| Elevated-stable                                              | 300 (5.6)          | 42                     | 14.1                      | 14.0(10.3-18.4)        | 56                               | 19.7                      | 18.7(14.4-23.5)        |
| Moderate-stable                                              | 1,152 (21.4)       | 99                     | 9.5                       | 8.6 (7.0-10.4)         | 132                              | 10.7                      | 11.5 (9.7-13.4)        |
| Low-increasing                                               | 1,052 (19.5)       | 85                     | 6.3                       | 8.1 (6.5-9.9)          | 60                               | 5.4                       | 5.7 (4.4-7.3)          |
| Moderate-fast-decline                                        | 565 (10.5)         | 38                     | 5.5                       | 6.7 (4.8-9.1)          | 35                               | 4.7                       | 6.2 (4.4-8.5)          |
| Low-declining                                                | 1,901 (35.3)       | 98                     | 3.7                       | 5.2 (4.2-6.2)          | 44                               | 2.3                       | 2.3 (1.7-3.1)          |
| Ultra-low-declining                                          | 412 (7.7)          | 9                      | 2.1                       | 2.2 (1.0-4.1)          | 3                                | 0.9                       | 0.7 (0.2-2.1)          |
| <b>Overall</b>                                               | <b>5,382</b>       | <b>371</b>             | <b>6.1</b>                | <b>6.9 (6.2-7.6)</b>   | <b>330</b>                       | <b>5.8</b>                | <b>6.1 (5.5-6.8)</b>   |
| <b>Nulliparity and Black (N=1,190)</b>                       |                    |                        |                           |                        |                                  |                           |                        |
| Elevated-stable                                              | 85 (7.1)           | 7                      | 15.6                      | 8.2 (3.4-16.2)         | 13                               | 14.6                      | 15.3 (8.4-24.7)        |
| Moderate-stable                                              | 328 (27.6)         | 28                     | 10.2                      | 8.5 (5.7-12.1)         | 30                               | 7.8                       | 9.1 (6.3-12.8)         |
| Low-increasing                                               | 272 (22.9)         | 21                     | 6.4                       | 7.7 (4.8-11.6)         | 16                               | 3.8                       | 5.9 (3.4-9.4)          |
| Moderate-fast-decline                                        | 123 (10.3)         | 12                     | 5.6                       | 9.8 (5.1-16.4)         | 3                                | 3.2                       | 2.4 (0.5-7.0)          |
| Low-declining                                                | 334 (28.1)         | 16                     | 3.7                       | 4.8 (2.8-7.7)          | 9                                | 1.6                       | 2.7 (1.2-5.1)          |
| Ultra-low-declining                                          | 48 (4.0)           | 1                      | 2.1                       | 2.1 (0.1-11.1)         | 1                                | 0.7                       | 2.1 (0.1-11.1)         |
| <b>Overall</b>                                               | <b>1,190</b>       | <b>85</b>              | <b>7.1</b>                | <b>7.1 (5.7-8.8)</b>   | <b>72</b>                        | <b>4.9</b>                | <b>6.1 (4.8-7.6)</b>   |
| <b>Nulliparity and Government Health Insurance (N=1,049)</b> |                    |                        |                           |                        |                                  |                           |                        |
| Elevated-stable                                              | 52 (5.0)           | 8                      | 13.6                      | 15.4 (6.9-28.1)        | 5                                | 16.3                      | 9.6 (3.2-21.0)         |
| Moderate-stable                                              | 209 (19.9)         | 23                     | 9.1                       | 11.0 (7.1-16.1)        | 25                               | 8.8                       | 12.0 (7.9-17.1)        |
| Low-increasing                                               | 220 (21.0)         | 12                     | 6.0                       | 5.5 (2.8-9.3)          | 10                               | 4.5                       | 4.5 (2.2-8.2)          |
| Moderate-fast-decline                                        | 123 (11.7)         | 5                      | 5.3                       | 4.1 (1.3-9.2)          | 5                                | 3.8                       | 4.1 (1.3-9.2)          |
| Low-declining                                                | 382 (36.4)         | 21                     | 3.6                       | 5.5 (3.4-8.3)          | 6                                | 1.9                       | 1.6 (0.6-3.4)          |
| Ultra-low-declining                                          | 63 (6.0)           | 0                      | 2.0                       | 0.0 (0.0-5.7)          | 1                                | 0.8                       | 1.6 (0.0-8.5)          |
| <b>Overall</b>                                               | <b>1,049</b>       | <b>69</b>              | <b>5.8</b>                | <b>6.6 (5.2-8.3)</b>   | <b>52</b>                        | <b>4.7</b>                | <b>5.0 (3.7-6.5)</b>   |
| <b>Nulliparity and Obesity (N=4,277)</b>                     |                    |                        |                           |                        |                                  |                           |                        |
| Elevated-stable                                              | 777 (18.2)         | 103                    | 14.8                      | 13.3(11.0-15.8)        | 161                              | 20.8                      | 20.7(17.9-23.7)        |
| Moderate-stable                                              | 1,820 (42.6)       | 197                    | 10.3                      | 10.8 (9.4-12.3)        | 228                              | 11.5                      | 12.5(11.0-14.1)        |
| Low-increasing                                               | 825 (19.3)         | 68                     | 6.9                       | 8.2 (6.5-10.3)         | 51                               | 5.8                       | 6.2 (4.6-8.0)          |
| Moderate-fast-decline                                        | 375 (8.8)          | 32                     | 6.1                       | 8.5 (5.9-11.8)         | 24                               | 5.1                       | 6.4 (4.1-9.4)          |
| Low-declining                                                | 456 (10.7)         | 27                     | 4.1                       | 5.9 (3.9-8.5)          | 12                               | 2.6                       | 2.6 (1.4-4.6)          |
| Ultra-low-declining                                          | 24 (0.6)           | 0                      | 2.2                       | 0.0 (0.0-14.2)         | 0                                | 1.0                       | 0.0 (0.0-14.2)         |
| <b>Overall</b>                                               | <b>4,277</b>       | <b>427</b>             | <b>9.4</b>                | <b>10.0 (9.1-10.9)</b> | <b>476</b>                       | <b>10.5</b>               | <b>11.1(10.2-12.1)</b> |

**Table S9, Continued:**

| BP Trajectory Groups                                   | N (col %)<br>women | Pre-<br>eclampsia<br>n | Average<br>Predicted<br>% | Observed %<br>(95% CI) | Gestational<br>Hypertension<br>n | Average<br>Predicted<br>% | Observed %<br>(95% CI) |
|--------------------------------------------------------|--------------------|------------------------|---------------------------|------------------------|----------------------------------|---------------------------|------------------------|
| <b>Obesity and Black (N=351)</b>                       |                    |                        |                           |                        |                                  |                           |                        |
| Elevated-stable                                        | 47 (13.4)          | 6                      | 7.7                       | 12.8 (4.8-25.7)        | 4                                | 11.3                      | 8.5 (2.4-20.4)         |
| Moderate-stable                                        | 158 (45.0)         | 11                     | 4.7                       | 7.0 (3.5-12.1)         | 6                                | 5.6                       | 3.8 (1.4-8.1)          |
| Low-increasing                                         | 70 (19.9)          | 2                      | 2.8                       | 2.9 (0.3-9.9)          | 0                                | 2.5                       | 0.0 (0.0-5.1)          |
| Moderate-fast-decline                                  | 29 (8.3)           | 0                      | 2.4                       | 0.0 (0.0-11.9)         | 1                                | 2.1                       | 3.4 (0.1-17.8)         |
| Low-declining                                          | 43 (12.3)          | 1                      | 1.6                       | 2.3 (0.1-12.3)         | 1                                | 1.0                       | 2.3 (0.1-12.3)         |
| Ultra-low-declining                                    | 4 (1.1)            | 0                      | 0.9                       | 0.0 (0.0-60.2)         | 0                                | 0.4                       | 0.0 (0.0-60.2)         |
| <b>Overall</b>                                         | <b>351</b>         | <b>20</b>              | <b>4.1</b>                | <b>5.7 (3.5-8.7)</b>   | <b>12</b>                        | <b>4.9</b>                | <b>3.4 (1.8-5.9)</b>   |
| <b>Obesity and Government Health Insurance (N=465)</b> |                    |                        |                           |                        |                                  |                           |                        |
| Elevated-stable                                        | 49 (10.5)          | 2                      | 7.5                       | 4.1 (0.5-14.0)         | 4                                | 13.0                      | 8.2 (2.3-19.6)         |
| Moderate-stable                                        | 186 (40.0)         | 4                      | 4.3                       | 2.2 (0.6-5.4)          | 9                                | 6.2                       | 4.8 (2.2-9.0)          |
| Low-increasing                                         | 85 (18.3)          | 1                      | 2.8                       | 1.2 (0.0-6.4)          | 1                                | 2.9                       | 1.2 (0.0-6.4)          |
| Moderate-fast-decline                                  | 50 (10.8)          | 3                      | 2.4                       | 6.0 (1.3-16.5)         | 2                                | 2.4                       | 4.0 (0.5-13.7)         |
| Low-declining                                          | 91 (19.6)          | 3                      | 1.6                       | 3.3 (0.7-9.3)          | 0                                | 1.2                       | 0.0 (0.0-4.0)          |
| Ultra-low-declining                                    | 4 (0.9)            | 0                      | 0.8                       | 0.0 (0.0-60.2)         | 0                                | 0.5                       | 0.0 (0.0-60.2)         |
| <b>Overall</b>                                         | <b>465</b>         | <b>13</b>              | <b>3.6</b>                | <b>2.8 (1.5-4.7)</b>   | <b>16</b>                        | <b>4.9</b>                | <b>3.4 (2.0-5.5)</b>   |
| <b>Obesity and Age ≥35 y (N=1,462)</b>                 |                    |                        |                           |                        |                                  |                           |                        |
| Elevated-stable                                        | 176 (12.0)         | 16                     | 7.0                       | 9.1 (5.3-14.3)         | 24                               | 13.7                      | 13.6 (8.9-19.6)        |
| Moderate-stable                                        | 537 (36.7)         | 25                     | 4.4                       | 4.7 (3.0-6.8)          | 42                               | 6.7                       | 7.8 (5.7-10.4)         |
| Low-increasing                                         | 311 (21.3)         | 10                     | 2.8                       | 3.2 (1.6-5.8)          | 11                               | 3.1                       | 3.5 (1.8-6.2)          |
| Moderate-fast-decline                                  | 165 (11.3)         | 4                      | 2.5                       | 2.4 (0.7-6.1)          | 4                                | 2.7                       | 2.4 (0.7-6.1)          |
| Low-declining                                          | 254 (17.4)         | 4                      | 1.6                       | 1.6 (0.4-4.0)          | 7                                | 1.3                       | 2.8 (1.1-5.6)          |
| Ultra-low-declining                                    | 19 (1.3)           | 0                      | 0.9                       | 0.0 (0.0-17.6)         | 1                                | 0.5                       | 5.3 (0.1-26.0)         |
| <b>Overall</b>                                         | <b>1,462</b>       | <b>59</b>              | <b>3.6</b>                | <b>4.0 (3.1-5.2)</b>   | <b>89</b>                        | <b>5.3</b>                | <b>6.1 (4.9-7.4)</b>   |

**Table S10. Models for Early Pregnancy Blood Pressure Trajectory Groups Plus Risk Factors Among Women with Obesity and No Risk Factors Stratified by Racial and Ethnic Groups: Average Predicted Probabilities (n, %) and the Observed Incidence Rate (n, % and 95% Confidence Intervals) of Preeclampsia and Gestational Hypertension within the Internal Validation Sample (n=74,274) of Low-to-Moderate Risk Women. USPSTF Moderate Risk Factors = Black race, Obesity, Nulliparity, Age ≥35 years, Low income/Government insurance, or Pregestational Diabetes**

| BP Trajectory Groups                    | N (col %)<br>women | Pre-<br>eclampsia<br>n | Average<br>Predicted<br>% | Observed %<br>(95% CI) | Gestational<br>Hypertension<br>n | Average<br>Predicted<br>% | Observed %<br>(95% CI) |
|-----------------------------------------|--------------------|------------------------|---------------------------|------------------------|----------------------------------|---------------------------|------------------------|
| <b>Black Race and Obesity (N=351)</b>   |                    |                        |                           |                        |                                  |                           |                        |
| Elevated-stable                         | 47 (13.4)          | 6                      | 7.7                       | 12.8 (4.8-25.7)        | 4                                | 11.3                      | 8.5 (2.4-20.4)         |
| Moderate-stable                         | 158 (45.0)         | 11                     | 4.7                       | 7.0 (3.5-12.1)         | 6                                | 5.6                       | 3.8 (1.4-8.1)          |
| Low-increasing                          | 70 (19.9)          | 2                      | 2.8                       | 2.9 (0.3-9.9)          | 0                                | 2.5                       | 0.0 (0.0-5.1)          |
| Moderate-fast-decline                   | 29 (8.3)           | 0                      | 2.4                       | 0.0 (0.0-11.9)         | 1                                | 2.1                       | 3.4 (0.1-17.8)         |
| Low-declining                           | 43 (12.3)          | 1                      | 1.6                       | 2.3 (0.1-12.3)         | 1                                | 1.0                       | 2.3 (0.1-12.3)         |
| Ultra-low-declining                     | 4 (1.1)            | 0                      | 0.9                       | 0.0 (0.0-60.2)         | 0                                | 0.4                       | 0.0 (0.0-60.2)         |
| <b>Overall</b>                          | 351                | 20                     | 4.1                       | 5.7 (3.5-8.7)          | 12                               | 4.9                       | 3.4 (1.8-5.9)          |
| <b>Hispanic and Obesity (N=1,547)</b>   |                    |                        |                           |                        |                                  |                           |                        |
| Elevated-stable                         | 161 (10.4)         | 13                     | 7.2                       | 8.1 (4.4-13.4)         | 13                               | 9.5                       | 8.1 (4.4-13.4)         |
| Moderate-stable                         | 499 (32.3)         | 28                     | 4.4                       | 5.6 (3.8-8.0)          | 15                               | 4.6                       | 3.0 (1.7-4.9)          |
| Low-increasing                          | 366 (23.7)         | 8                      | 2.7                       | 2.2 (0.9-4.3)          | 6                                | 2.2                       | 1.6 (0.6-3.5)          |
| Moderate-fast-decline                   | 167 (10.8)         | 3                      | 2.4                       | 1.8 (0.4-5.2)          | 2                                | 1.9                       | 1.2 (0.1-4.3)          |
| Low-declining                           | 342 (22.1)         | 2                      | 1.5                       | 0.6 (0.1-2.1)          | 5                                | 0.9                       | 1.5 (0.5-3.4)          |
| Ultra-low-declining                     | 12 (0.8)           | 0                      | 0.8                       | 0.0 (0.0-26.5)         | 0                                | 0.3                       | 0.0 (0.0-26.5)         |
| <b>Overall</b>                          | 1,547              | 54                     | 3.4                       | 3.5 (2.6-4.5)          | 41                               | 3.4                       | 2.7 (1.9-3.6)          |
| <b>Asian and Obesity (N=393)</b>        |                    |                        |                           |                        |                                  |                           |                        |
| Elevated-stable                         | 46 (11.7)          | 4                      | 6.0                       | 8.7 (2.4-20.8)         | 3                                | 10.3                      | 6.5 (1.4-17.9)         |
| Moderate-stable                         | 123 (31.3)         | 2                      | 3.8                       | 1.6 (0.2-5.8)          | 7                                | 5.4                       | 5.7 (2.3-11.4)         |
| Low-increasing                          | 88 (22.4)          | 1                      | 2.3                       | 1.1 (0.0-6.2)          | 0                                | 2.6                       | 0.0 (0.0-4.1)          |
| Moderate-fast-decline                   | 47 (12.0)          | 0                      | 2.1                       | 0.0 (0.0-7.5)          | 0                                | 2.2                       | 0.0 (0.0-7.5)          |
| Low-declining                           | 79 (20.1)          | 0                      | 1.3                       | 0.0 (0.0-4.6)          | 0                                | 1.1                       | 0.0 (0.0-4.6)          |
| Ultra-low-declining                     | 10 (2.5)           | 0                      | 0.8                       | 0.0 (0.0-30.8)         | 0                                | 0.5                       | 0.0 (0.0-30.8)         |
| <b>Overall</b>                          | 393                | 7                      | 2.9                       | 1.8 (0.7-3.6)          | 10                               | 4.0                       | 2.5 (1.2-4.6)          |
| <b>White Race and Obesity (N=1,186)</b> |                    |                        |                           |                        |                                  |                           |                        |
| Elevated-stable                         | 197 (16.6)         | 16                     | 5.2                       | 8.1 (4.7-12.9)         | 35                               | 12.5                      | 17.8(12.7-23.8)        |
| Moderate-stable                         | 444 (37.4)         | 13                     | 3.1                       | 2.9 (1.6-5.0)          | 27                               | 6.0                       | 6.1 (4.0-8.7)          |
| Low-increasing                          | 233 (19.6)         | 3                      | 1.9                       | 1.3 (0.3-3.7)          | 8                                | 2.9                       | 3.4 (1.5-6.7)          |
| Moderate-fast-decline                   | 120 (10.1)         | 2                      | 1.7                       | 1.7 (0.2-5.9)          | 2                                | 2.5                       | 1.7 (0.2-5.9)          |
| Low-declining                           | 183 (15.4)         | 1                      | 1.1                       | 0.5 (0.0-3.0)          | 2                                | 1.2                       | 1.1 (0.1-3.9)          |
| Ultra-low-declining                     | 9 (0.8)            | 0                      | 0.6                       | 0.0 (0.0-33.6)         | 0                                | 0.5                       | 0.0 (0.0-33.6)         |
| <b>Overall</b>                          | 1,186              | 35                     | 2.8                       | 3.0 (2.1-4.1)          | 74                               | 5.3                       | 6.2 (4.9-7.8)          |

**Table S11. Models for Early Pregnancy Blood Pressure Trajectory Groups Plus Risk Factors Among Nulliparas (with or without risk factors) Stratified by Pre-pregnancy BMI Groups: Average Predicted Probabilities (n, %) and the Observed Incidence Rate (n, % and 95% Confidence Intervals) of Preeclampsia and Gestational Hypertension within the Internal Validation Sample (n=74,274) of Low-to-Moderate Risk Women. USPSTF Moderate Risk Factors = Black race, Obesity, Nulliparity, Age ≥35 years, Low income/Government insurance, or Pregestational Diabetes**

| BP Trajectory Groups                                | N (col %)<br>women | Pre-<br>eclampsia<br>n | Average<br>Predicted<br>% | Observed %<br>(95% CI) | Gestational<br>Hypertension<br>n | Average<br>Predicted<br>% | Observed %<br>(95% CI) |
|-----------------------------------------------------|--------------------|------------------------|---------------------------|------------------------|----------------------------------|---------------------------|------------------------|
| <b>All Nulliparas with Normal Weight (N=23,042)</b> |                    |                        |                           |                        |                                  |                           |                        |
| Elevated-stable                                     | 947 (4.1)          | 107                    | 12.4                      | 11.3 (9.4-13.5)        | 151                              | 15.5                      | 15.9(13.7-18.4)        |
| Moderate-stable                                     | 4,546 (19.7)       | 317                    | 8.3                       | 7.0 (6.2-7.8)          | 382                              | 8.3                       | 8.4 (7.6-9.2)          |
| Low-increasing                                      | 4,382 (19.0)       | 247                    | 5.4                       | 5.6 (5.0-6.4)          | 180                              | 4.2                       | 4.1 (3.5-4.7)          |
| Moderate-fast-decline                               | 2,459 (10.7)       | 106                    | 4.9                       | 4.3 (3.5-5.2)          | 101                              | 3.7                       | 4.1 (3.4-5.0)          |
| Low-declining                                       | 8,947 (38.8)       | 306                    | 3.3                       | 3.4 (3.1-3.8)          | 161                              | 1.8                       | 1.8 (1.5-2.1)          |
| Ultra-low-declining                                 | 1,761 (7.6)        | 30                     | 1.9                       | 1.7 (1.2-2.4)          | 15                               | 0.7                       | 0.9 (0.5-1.4)          |
| <b>Overall</b>                                      | 23,042             | 1,113                  | 5.1                       | 4.8 (4.6-5.1)          | 990                              | 4.2                       | 4.3 (4.0-4.6)          |
| <b>All Nulliparas with Overweight (N=10,741)</b>    |                    |                        |                           |                        |                                  |                           |                        |
| Elevated-stable                                     | 1,035 (9.6)        | 124                    | 13.8                      | 12.0(10.1-14.1)        | 181                              | 17.6                      | 17.5(15.2-19.9)        |
| Moderate-stable                                     | 3,543 (33.0)       | 341                    | 9.5                       | 9.6 (8.7-10.6)         | 364                              | 9.4                       | 10.3 (9.3-11.3)        |
| Low-increasing                                      | 2,336 (21.7)       | 144                    | 6.2                       | 6.2 (5.2-7.2)          | 114                              | 4.8                       | 4.9 (4.0-5.8)          |
| Moderate-fast-decline                               | 1,146 (10.7)       | 65                     | 5.6                       | 5.7 (4.4-7.2)          | 42                               | 4.2                       | 3.7 (2.7-4.9)          |
| Low-declining                                       | 2,454 (22.8)       | 93                     | 3.8                       | 3.8 (3.1-4.6)          | 61                               | 2.1                       | 2.5 (1.9-3.2)          |
| Ultra-low-declining                                 | 227 (2.1)          | 4                      | 2.2                       | 1.8 (0.5-4.5)          | 4                                | 0.9                       | 1.8 (0.5-4.5)          |
| <b>Overall</b>                                      | 10,741             | 771                    | 7.3                       | 7.2 (6.7-7.7)          | 766                              | 6.8                       | 7.1 (6.7-7.6)          |
| <b>All Nulliparas with Obesity (N=7,376)</b>        |                    |                        |                           |                        |                                  |                           |                        |
| Elevated-stable                                     | 1,355 (18.4)       | 224                    | 16.3                      | 16.5(14.6-18.6)        | 273                              | 21.4                      | 20.1(18.0-22.4)        |
| Moderate-stable                                     | 3,158 (42.8)       | 380                    | 11.3                      | 12.0(10.9-13.2)        | 396                              | 11.8                      | 12.5(11.4-13.7)        |
| Low-increasing                                      | 1,396 (18.9)       | 123                    | 7.6                       | 8.8 (7.4-10.4)         | 98                               | 6.0                       | 7.0 (5.7-8.5)          |
| Moderate-fast-decline                               | 644 (8.7)          | 47                     | 6.8                       | 7.3 (5.4-9.6)          | 43                               | 5.2                       | 6.7 (4.9-8.9)          |
| Low-declining                                       | 784 (10.6)         | 46                     | 4.4                       | 5.9 (4.3-7.7)          | 30                               | 2.7                       | 3.8 (2.6-5.4)          |
| Ultra-low-declining                                 | 39 (0.5)           | 0                      | 2.4                       | 0.0 (0.0-9.0)          | 1                                | 1.1                       | 2.6 (0.1-13.5)         |
| <b>Overall</b>                                      | 7,376              | 820                    | 10.3                      | 11.1(10.4-11.9)        | 841                              | 10.9                      | 11.4(10.7-12.1)        |



**Table S12. Models for Early Pregnancy Blood Pressure Trajectory Groups Plus Risk Factors Among Pre-pregnancy Body Mass Index Categories: Average Predicted Probabilities (n, %) and the Observed Incidence Rate (n, % and 95% Confidence Intervals) of Preeclampsia and Gestational Hypertension within the Internal Validation Sample (n=74,274) of Low-to-Moderate Risk Women. USPSTF Moderate Risk Factors = Black race, Obesity, Nulliparity, Age ≥35 years, Low income/Government insurance, or Pregestational Diabetes**

| BP Trajectory Groups                | N (col %)<br>women | Pre-<br>eclampsia<br>n | Average<br>Predicted<br>% | Observed %<br>(95% CI) | Gestational<br>Hypertension<br>n | Average<br>Predicted<br>% | Observed %<br>(95% CI) |
|-------------------------------------|--------------------|------------------------|---------------------------|------------------------|----------------------------------|---------------------------|------------------------|
| <b>All Underweight (N=2,092)</b>    |                    |                        |                           |                        |                                  |                           |                        |
| Elevated-stable                     | 30 (0.1)           | 1                      | 10.2                      | 3.3 (0.1-17.2)         | 6                                | 12.1                      | 20.0 (7.7-38.6)        |
| Moderate-stable                     | 221 (0.8)          | 10                     | 5.9                       | 4.5 (2.2-8.2)          | 16                               | 5.9                       | 7.2 (4.2-11.5)         |
| Low-increasing                      | 265 (1.0)          | 18                     | 3.8                       | 6.8 (4.1-10.5)         | 6                                | 2.8                       | 2.3 (0.8-4.9)          |
| Moderate-fast-decline               | 182 (0.7)          | 5                      | 3.5                       | 2.7 (0.9-6.3)          | 9                                | 2.5                       | 4.9 (2.3-9.2)          |
| Low-declining                       | 964 (3.6)          | 21                     | 2.3                       | 2.2 (1.4-3.3)          | 18                               | 1.2                       | 1.9 (1.1-2.9)          |
| Ultra-low-declining                 | 430 (1.6)          | 9                      | 1.2                       | 2.1 (1.0-3.9)          | 1                                | 0.5                       | 0.2 (0.0-1.3)          |
| <b>Overall</b>                      | 2,092              | 64                     | 2.9                       | 3.1 (2.4-3.9)          | 56                               | 2.0                       | 2.7 (2.0-3.5)          |
| <b>All Normal weight (N=36,978)</b> |                    |                        |                           |                        |                                  |                           |                        |
| Elevated-stable                     | 1,272 (4.7)        | 128                    | 10.5                      | 10.1 (8.5-11.8)        | 186                              | 13.5                      | 14.6(12.7-16.7)        |
| Moderate-stable                     | 6,545 (24.2)       | 372                    | 6.7                       | 5.7 (5.1-6.3)          | 458                              | 7.0                       | 7.0 (6.4-7.6)          |
| Low-increasing                      | 6,720 (24.8)       | 279                    | 4.2                       | 4.2 (3.7-4.7)          | 219                              | 3.4                       | 3.3 (2.8-3.7)          |
| Moderate-fast-decline               | 3,822 (14.1)       | 122                    | 3.7                       | 3.2 (2.7-3.8)          | 121                              | 2.9                       | 3.2 (2.6-3.8)          |
| Low-declining                       | 15,273 (56.4)      | 358                    | 2.4                       | 2.3 (2.1-2.6)          | 215                              | 1.4                       | 1.4 (1.2-1.6)          |
| Ultra-low-declining                 | 3,346 (12.4)       | 43                     | 1.3                       | 1.3 (0.9-1.7)          | 18                               | 0.5                       | 0.5 (0.3-0.8)          |
| <b>Overall</b>                      | 36,978             | 1,302                  | 3.8                       | 3.5 (3.3-3.7)          | 1,217                            | 3.2                       | 3.3 (3.1-3.5)          |
| <b>All Overweight (N=20,148)</b>    |                    |                        |                           |                        |                                  |                           |                        |
| Elevated-stable                     | 1,527 (5.6)        | 150                    | 11.2                      | 9.8 (8.4-11.4)         | 242                              | 14.9                      | 15.8(14.1-17.8)        |
| Moderate-stable                     | 5,900 (21.8)       | 420                    | 7.1                       | 7.1 (6.5-7.8)          | 483                              | 7.4                       | 8.2 (7.5-8.9)          |
| Low-increasing                      | 4,386 (16.2)       | 180                    | 4.3                       | 4.1 (3.5-4.7)          | 159                              | 3.6                       | 3.6 (3.1-4.2)          |
| Moderate-fast-decline               | 2,162 (8.0)        | 87                     | 3.9                       | 4.0 (3.2-4.9)          | 58                               | 3.1                       | 2.7 (2.0-3.5)          |
| Low-declining                       | 5,580 (20.6)       | 139                    | 2.4                       | 2.5 (2.1-2.9)          | 94                               | 1.4                       | 1.7 (1.4-2.1)          |
| Ultra-low-declining                 | 593 (2.2)          | 5                      | 1.3                       | 0.8 (0.3-2.0)          | 7                                | 0.6                       | 1.2 (0.5-2.4)          |
| <b>Overall</b>                      | 20,148             | 981                    | 5.0                       | 4.9 (4.6-5.2)          | 1,043                            | 4.8                       | 5.2 (4.9-5.5)          |
| <b>All Obesity (N=15,056)</b>       |                    |                        |                           |                        |                                  |                           |                        |
| Elevated-stable                     | 2,325 (8.6)        | 310                    | 12.5                      | 13.3 (12.0-14.8)       | 400                              | 17.5                      | 17.2(15.7-18.8)        |
| Moderate-stable                     | 5,964 (22.0)       | 511                    | 8.1                       | 8.6 (7.9-9.3)          | 547                              | 9.0                       | 9.2 (8.5-9.9)          |
| Low-increasing                      | 2,982 (11.0)       | 166                    | 5.0                       | 5.6 (4.8-6.5)          | 136                              | 4.3                       | 4.6 (3.8-5.4)          |
| Moderate-fast-decline               | 1,449 (5.3)        | 70                     | 4.4                       | 4.8 (3.8-6.1)          | 59                               | 3.6                       | 4.1 (3.1-5.2)          |
| Low-declining                       | 2,208 (8.2)        | 66                     | 2.6                       | 3.0 (2.3-3.8)          | 50                               | 1.7                       | 2.3 (1.7-3.0)          |
| Ultra-low-declining                 | 128 (0.5)          | 0                      | 1.3                       | 0.0 (0.0-2.8)          | 2                                | 0.6                       | 1.6 (0.2-5.5)          |
| <b>Overall</b>                      | 15,056             | 1,123                  | 6.9                       | 7.5 (7.0-7.9)          | 1,194                            | 7.7                       | 7.9 (7.5-8.4)          |

**Table S13. Models for Early Pregnancy Blood Pressure Trajectory Groups Plus Risk Factors Among Women with Diabetes with or without Other Risk Factors: Average Predicted Probabilities (n, %) and the Observed Incidence Rate (n, % and 95% Confidence Intervals) of Preeclampsia and Gestational Hypertension within the Internal Validation Sample (n=74,274) of Low-to-Moderate Risk Women. USPSTF Moderate Risk Factors = Black race, Obesity, Nulliparity, Age ≥35 years, Low income/Government insurance, or Pregestational Diabetes**

| BP Trajectory Groups                                                | N (col %)<br>women | Pre-<br>eclampsia<br>n | Average<br>Predicted<br>% | Observed %<br>(95% CI) | Gestational<br>Hypertension<br>n | Average<br>Predicted<br>% | Observed %<br>(95% CI) |
|---------------------------------------------------------------------|--------------------|------------------------|---------------------------|------------------------|----------------------------------|---------------------------|------------------------|
| <b>Pregestational Diabetes with or without Risk Factors (N=478)</b> |                    |                        |                           |                        |                                  |                           |                        |
| Elevated-stable                                                     | 65 (13.6)          | 13                     | 25.8                      | 20.0(11.1-31.8)        | 13                               | 16.5                      | 20.0(11.1-31.8)        |
| Moderate-stable                                                     | 179 (37.4)         | 28                     | 18.9                      | 15.6(10.7-21.8)        | 14                               | 9.3                       | 7.8 (4.3-12.8)         |
| Low-increasing                                                      | 89 (18.6)          | 12                     | 12.8                      | 13.5 (7.2-22.4)        | 8                                | 4.7                       | 9.0 (4.0-16.9)         |
| Moderate-fast-decline                                               | 68 (14.2)          | 7                      | 10.1                      | 10.3 (4.2-20.1)        | 4                                | 3.9                       | 5.9 (1.6-14.4)         |
| Low-declining                                                       | 61 (12.8)          | 7                      | 7.0                       | 11.5 (4.7-22.2)        | 5                                | 1.9                       | 8.2 (2.7-18.1)         |
| Ultra-low-declining                                                 | 16 (3.3)           | 0                      | 3.2                       | 0.0 (0.0-20.6)         | 0                                | 0.6                       | 0.0 (0.0-20.6)         |
| <b>Overall</b>                                                      | 478                | 67                     | 15.4                      | 14.0(11.0-17.5)        | 44                               | 7.4                       | 9.2 (6.8-12.2)         |

**Table S14. Sensitivity Analysis of Model Predictive Performance for Hypertensive Disorders of Pregnancy Utilizing Six Early Pregnancy Systolic Blood Pressure Trajectories Based on  $\leq 4$ ,  $\leq 3$ , and  $\leq 2$  Blood Pressure Measurements. C-statistics and 95% Confidence Intervals (95% CIs); N=74,967 Validation Dataset of Low-to-Moderate Risk Women.**

| Maximum Number of BPs used to determine BPT group                                                                                                                                                                                                                                                                                                                                                                                                                                                                                                                                                                                                                                                                                                                                                                                                                                              | Model number | Prediction Model C-statistics (95%CI) |                                            |                          |
|------------------------------------------------------------------------------------------------------------------------------------------------------------------------------------------------------------------------------------------------------------------------------------------------------------------------------------------------------------------------------------------------------------------------------------------------------------------------------------------------------------------------------------------------------------------------------------------------------------------------------------------------------------------------------------------------------------------------------------------------------------------------------------------------------------------------------------------------------------------------------------------------|--------------|---------------------------------------|--------------------------------------------|--------------------------|
|                                                                                                                                                                                                                                                                                                                                                                                                                                                                                                                                                                                                                                                                                                                                                                                                                                                                                                |              | Early-onset Preeclampsia (<34 weeks)  | Late-onset Preeclampsia ( $\geq 34$ weeks) | Gestational Hypertension |
| All available<br>(main results)                                                                                                                                                                                                                                                                                                                                                                                                                                                                                                                                                                                                                                                                                                                                                                                                                                                                | 3.0          | 0.711 (0.682-0.739)                   | 0.665 (0.656-0.674)                        | 0.734 (0.726-0.742)      |
|                                                                                                                                                                                                                                                                                                                                                                                                                                                                                                                                                                                                                                                                                                                                                                                                                                                                                                | 3.1          | 0.739 (0.710-0.767)                   | 0.725 (0.717-0.734)                        | 0.764 (0.756-0.772)      |
|                                                                                                                                                                                                                                                                                                                                                                                                                                                                                                                                                                                                                                                                                                                                                                                                                                                                                                | 3.2          | 0.747 (0.720-0.775)                   | 0.730 (0.722-0.739)                        | 0.768 (0.761-0.776)      |
|                                                                                                                                                                                                                                                                                                                                                                                                                                                                                                                                                                                                                                                                                                                                                                                                                                                                                                | 3.3          | 0.747 (0.719-0.775)                   | 0.731 (0.723-0.740)                        | 0.770 (0.762-0.778)      |
| 4                                                                                                                                                                                                                                                                                                                                                                                                                                                                                                                                                                                                                                                                                                                                                                                                                                                                                              | 3.0          | 0.702 (0.674-0.730)                   | 0.662 (0.653-0.671)                        | 0.730 (0.722-0.738)      |
|                                                                                                                                                                                                                                                                                                                                                                                                                                                                                                                                                                                                                                                                                                                                                                                                                                                                                                | 3.1          | 0.732 (0.704-0.760)                   | 0.724 (0.715-0.732)                        | 0.761 (0.754-0.769)      |
|                                                                                                                                                                                                                                                                                                                                                                                                                                                                                                                                                                                                                                                                                                                                                                                                                                                                                                | 3.2          | 0.743 (0.715-0.770)                   | 0.729 (0.720-0.737)                        | 0.766 (0.758-0.774)      |
|                                                                                                                                                                                                                                                                                                                                                                                                                                                                                                                                                                                                                                                                                                                                                                                                                                                                                                | 3.3          | 0.742 (0.714-0.770)                   | 0.730 (0.721-0.738)                        | 0.767 (0.760-0.775)      |
| 3                                                                                                                                                                                                                                                                                                                                                                                                                                                                                                                                                                                                                                                                                                                                                                                                                                                                                              | 3.0          | 0.693 (0.664-0.722)                   | 0.657 (0.647-0.666)                        | 0.730 (0.722-0.738)      |
|                                                                                                                                                                                                                                                                                                                                                                                                                                                                                                                                                                                                                                                                                                                                                                                                                                                                                                | 3.1          | 0.726 (0.697-0.755)                   | 0.720 (0.712-0.729)                        | 0.762 (0.754-0.769)      |
|                                                                                                                                                                                                                                                                                                                                                                                                                                                                                                                                                                                                                                                                                                                                                                                                                                                                                                | 3.2          | 0.734 (0.705-0.763)                   | 0.726 (0.717-0.734)                        | 0.766 (0.759-0.774)      |
|                                                                                                                                                                                                                                                                                                                                                                                                                                                                                                                                                                                                                                                                                                                                                                                                                                                                                                | 3.3          | 0.734 (0.705-0.763)                   | 0.727 (0.718-0.735)                        | 0.768 (0.760-0.776)      |
| 2                                                                                                                                                                                                                                                                                                                                                                                                                                                                                                                                                                                                                                                                                                                                                                                                                                                                                              | 3.0          | 0.682 (0.654-0.710)                   | 0.650 (0.641-0.660)                        | 0.718 (0.710-0.726)      |
|                                                                                                                                                                                                                                                                                                                                                                                                                                                                                                                                                                                                                                                                                                                                                                                                                                                                                                | 3.1          | 0.719 (0.690-0.748)                   | 0.717 (0.708-0.725)                        | 0.752 (0.744-0.760)      |
|                                                                                                                                                                                                                                                                                                                                                                                                                                                                                                                                                                                                                                                                                                                                                                                                                                                                                                | 3.2          | 0.727 (0.698-0.756)                   | 0.722 (0.713-0.730)                        | 0.757 (0.749-0.765)      |
|                                                                                                                                                                                                                                                                                                                                                                                                                                                                                                                                                                                                                                                                                                                                                                                                                                                                                                | 3.3          | 0.726 (0.697-0.755)                   | 0.723 (0.714-0.732)                        | 0.759 (0.751-0.767)      |
| <p><b>Abbreviations:</b> BP, blood pressure; BMI, pre-pregnancy body mass index; BPT, blood pressure trajectory</p> <p><b>Standard Risk factors:</b> pre-pregnancy BMI (kg/m<sup>2</sup>), parity (0 vs <math>\geq 1</math>), maternal age (years), racial and ethnic groups [Black, Hispanic, Asian, White (referent), Mixed/Native/unknown], and pregestational diabetes;</p> <p><b>Lifestyle Behaviors:</b> Smoking during pregnancy, and Rate of gestational weight gain (GWG) <math>\leq 20</math> weeks' gestation (kg per week).</p> <p><b>Social Factors:</b> Government health insurance and Neighborhood deprivation index.</p> <p><b>C-statistics for Model 3:</b> Six BPT groups Only, or BPT groups plus Standard Risk Factors, Lifestyle Behaviors and Social Factors.</p> <p>The total number (N) missing covariables for the prediction model (validation dataset) is 693.</p> |              |                                       |                                            |                          |

**Table S15. Sensitivity Analysis - Model Predictive Performance for Hypertensive Disorders of Pregnancy Utilizing Six Early Pregnancy Systolic Blood Pressure Trajectory Groups Limited to Blood Pressures measured up to 16 Weeks' Gestation (BPTL groups) and Risk Factors Available in Routine Prenatal Care (Clinical, Behavioral, and Social) Among Low-to-Moderate Risk Pregnant Women. C-statistics and (95% Confidence Intervals); N=74,913 validation dataset.**

| Model number | Predictive Model Variables                                                                                                      | Prediction Model C-statistics (95%CI) |                                     |                          |
|--------------|---------------------------------------------------------------------------------------------------------------------------------|---------------------------------------|-------------------------------------|--------------------------|
|              |                                                                                                                                 | Early-onset Preeclampsia (<34 weeks)  | Late-onset Preeclampsia (≥34 weeks) | Gestational Hypertension |
| 1.0.         | Standard Risk Factors:(BMI + Parity + Age + Race/ethnicity + Diabetes)                                                          | 0.688 (0.659-0.717)                   | 0.695 (0.686-0.704)                 | 0.692 (0.683-0.701)      |
| 2.0.         | Initial BP Only                                                                                                                 | 0.657 (0.626-0.687)                   | 0.631 (0.621-0.641)                 | 0.701 (0.692-0.709)      |
| 2.1.         | Initial BP + BMI + Parity                                                                                                       | 0.704 (0.675-0.733)                   | 0.708 (0.700-0.717)                 | 0.738 (0.730-0.746)      |
| 2.2.         | Initial BP + BMI + Parity + Age + Race/ethnicity + Diabetes                                                                     | 0.713 (0.685-0.741)                   | 0.714 (0.705-0.722)                 | 0.744 (0.736-0.752)      |
| 3.0.         | Six BPTL groups Only                                                                                                            | 0.705 (0.677-0.733)                   | 0.656 (0.647-0.665)                 | 0.723 (0.715-0.731)      |
| 3.1.         | Six BPTL groups + BMI + Parity                                                                                                  | 0.737 (0.708-0.766)                   | 0.720 (0.712-0.729)                 | 0.757 (0.749-0.764)      |
| 3.2.         | Six BPTL groups + Standard Risk Factors (BMI + Parity + Age + Race/ethnicity + Diabetes)                                        | 0.748 (0.721-0.775)                   | 0.725 (0.716-0.733)                 | 0.761 (0.753-0.769)      |
| 3.3.         | Six BPTL groups + Standard Risk factors (BMI + Parity + Age + Race/ethnicity + Diabetes) + Lifestyle Behaviors + Social Factors | 0.748 (0.721-0.775)                   | 0.726 (0.718-0.735)                 | 0.763 (0.755-0.771)      |

**Abbreviations:** BP, blood pressure; BMI, pre-pregnancy body mass index; BPTL, blood pressure trajectory groups limited to BP measurements from 0 to 16 weeks' gestation.

**Standard Risk factors:** pre-pregnancy BMI (kg/m<sup>2</sup>), parity (0 vs ≥1), maternal age (y), and racial and ethnic groups [Black, Hispanic, Asian, Mixed/Native/unknown, White (referent)], and pregestational Diabetes;

**Lifestyle Behaviors:** Smoking during pregnancy, and Rate of gestational weight gain (GWG) ≤ 20 weeks (kg per week)

**Social Factors:** Government insurance and Neighborhood deprivation index.

**C-statistics for Model 1:** Standard Risk factors, **Model 2:** Initial BP Only (≤14 weeks' gestation), or Initial BP plus Standard Risk Factors, and **Model 3:** Six BPTL groups Only, or BPTL groups plus Standard Risk Factors, and BPTL groups, Standard Risk Factors plus Lifestyle Behaviors and Social Factors. (Models Missing n = 54 women with no BP measurements ≤16 weeks' gestation).

Figure S1. Sample Selection Flow Chart

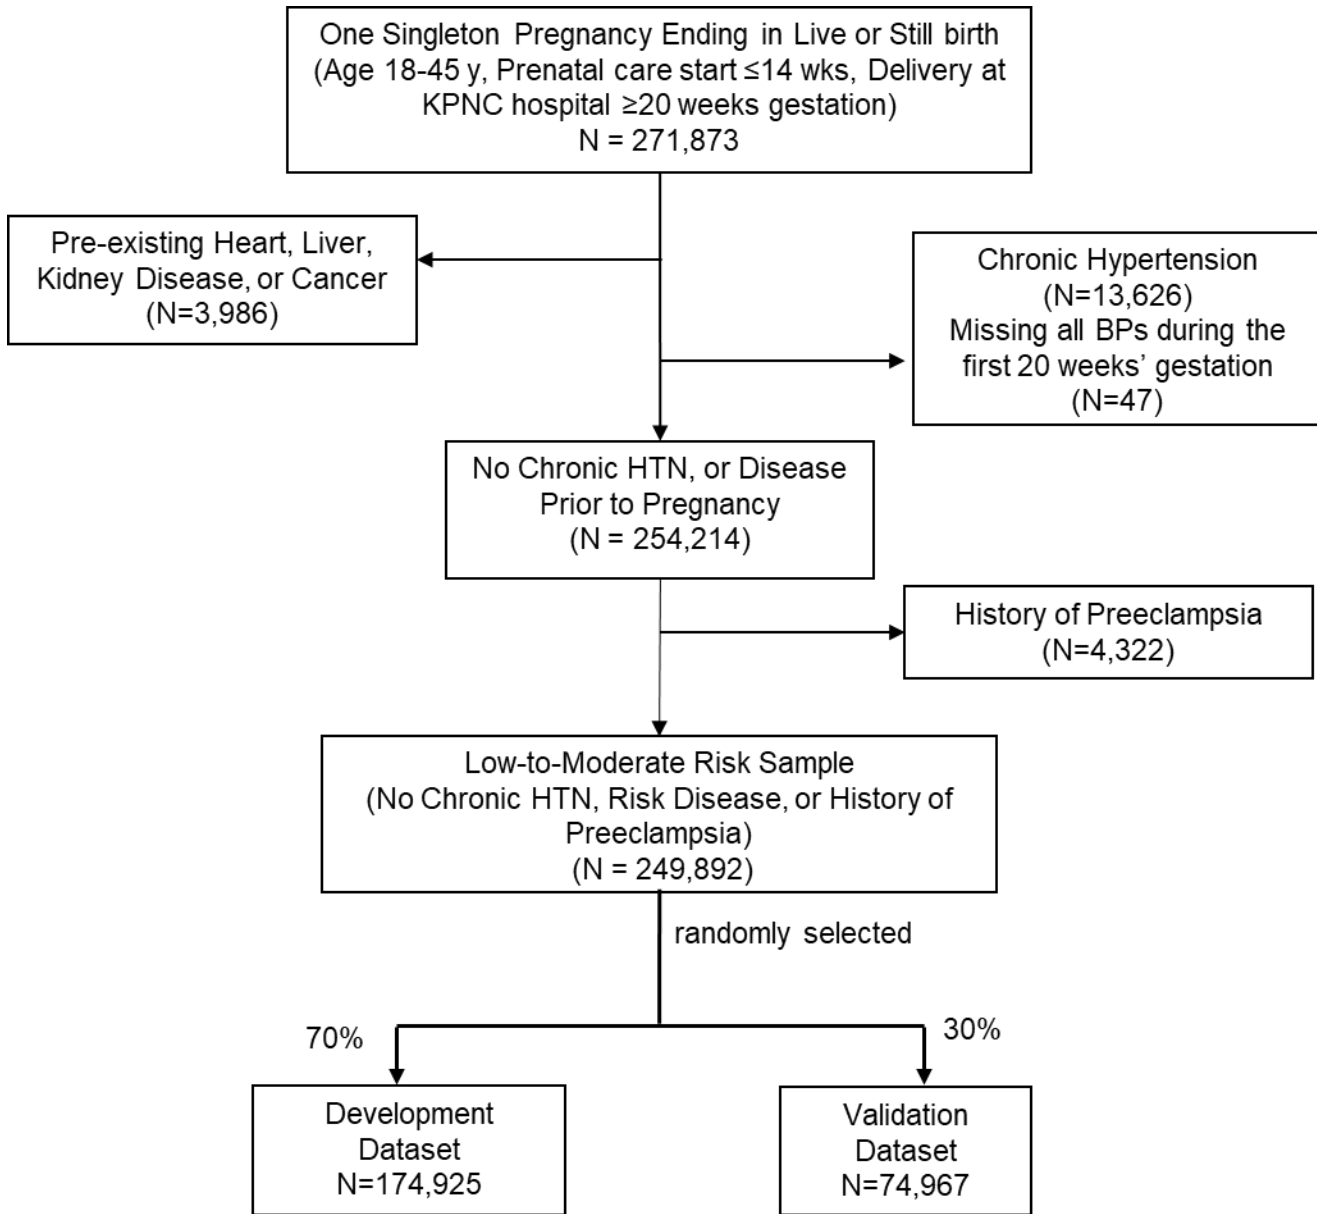

**Figure S2: Receiver Operating Characteristic (ROC) Curves for the Predictive Models: (A) Early-onset preeclampsia (<34 weeks gestational age), (B) Later-onset preeclampsia (≥34 weeks gestational age), and (C) Gestational Hypertension.**

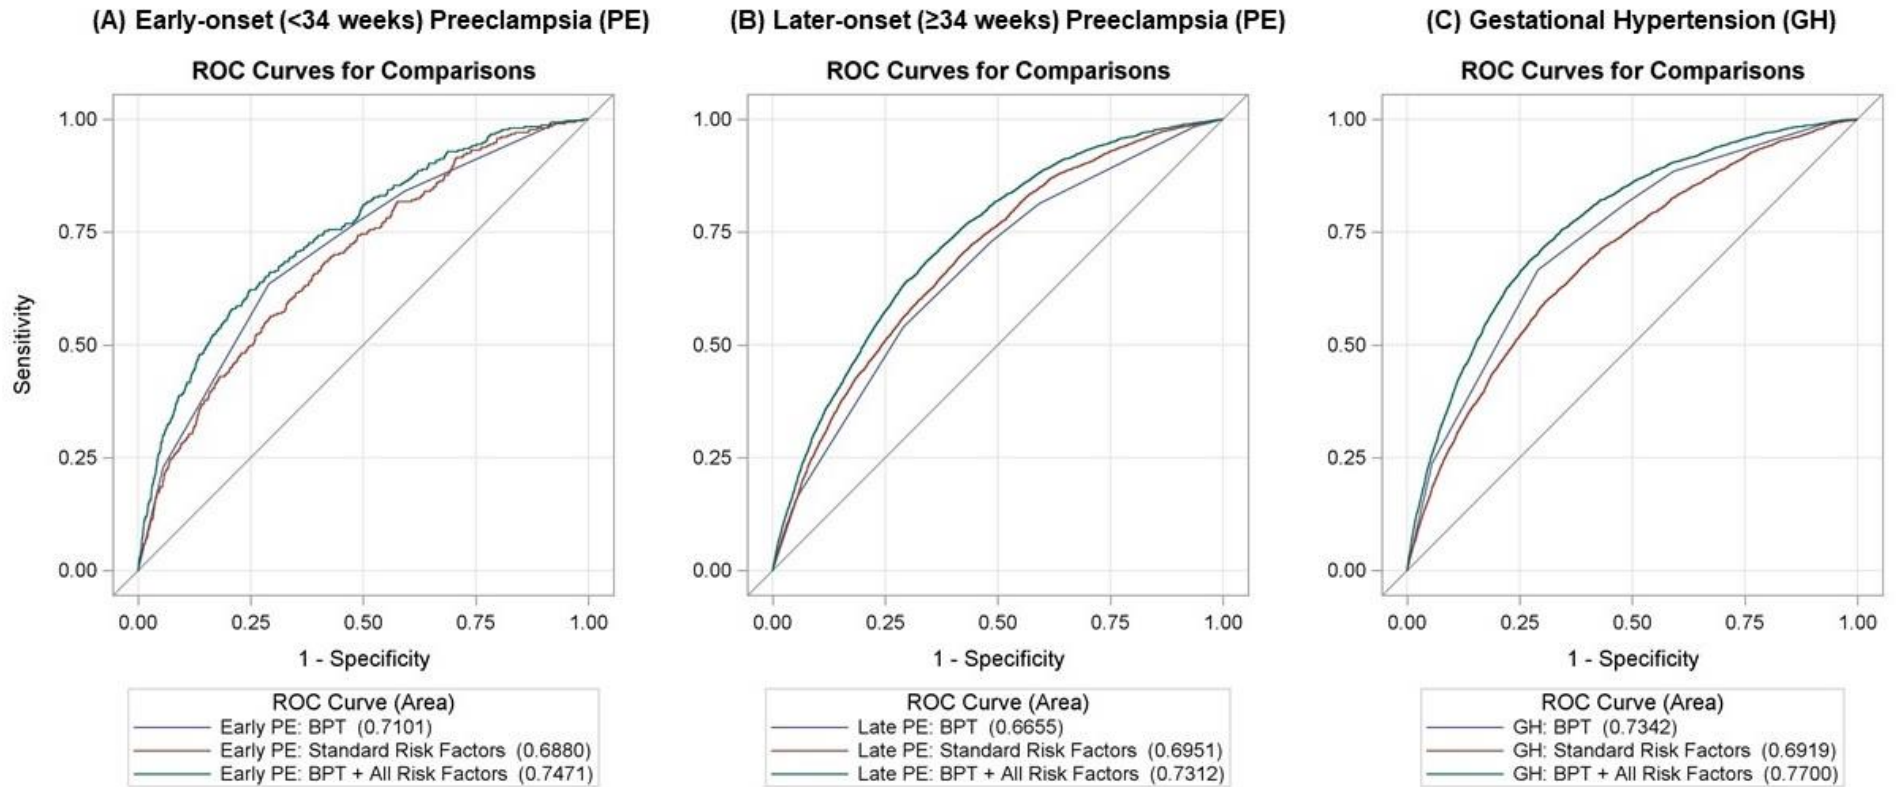

Specific Models:

BPT Model (purple): Blood pressure trajectory groups.

Standard Risk Factors (red): BMI + Parity + Age + Race/ethnicity + Diabetes.

BPT + All Risk Factors Model (green): BMI + Parity + Age + Race/ethnicity + Diabetes + Lifestyle Behaviors + Social Factors

**Figure S3. Decile Calibration Plots for Observation versus Prediction Models: (A) Early-onset preeclampsia <34 weeks gestational age; (B) Later-onset preeclampsia  $\geq$ 34 weeks gestational age; and (C) Gestational hypertension. Models include Early Pregnancy Systolic Blood Pressure Trajectory (BPT) Groups and All Risk Factors.**

(A) Early-onset preeclampsia (BPT groups + All Risk Factors Model)

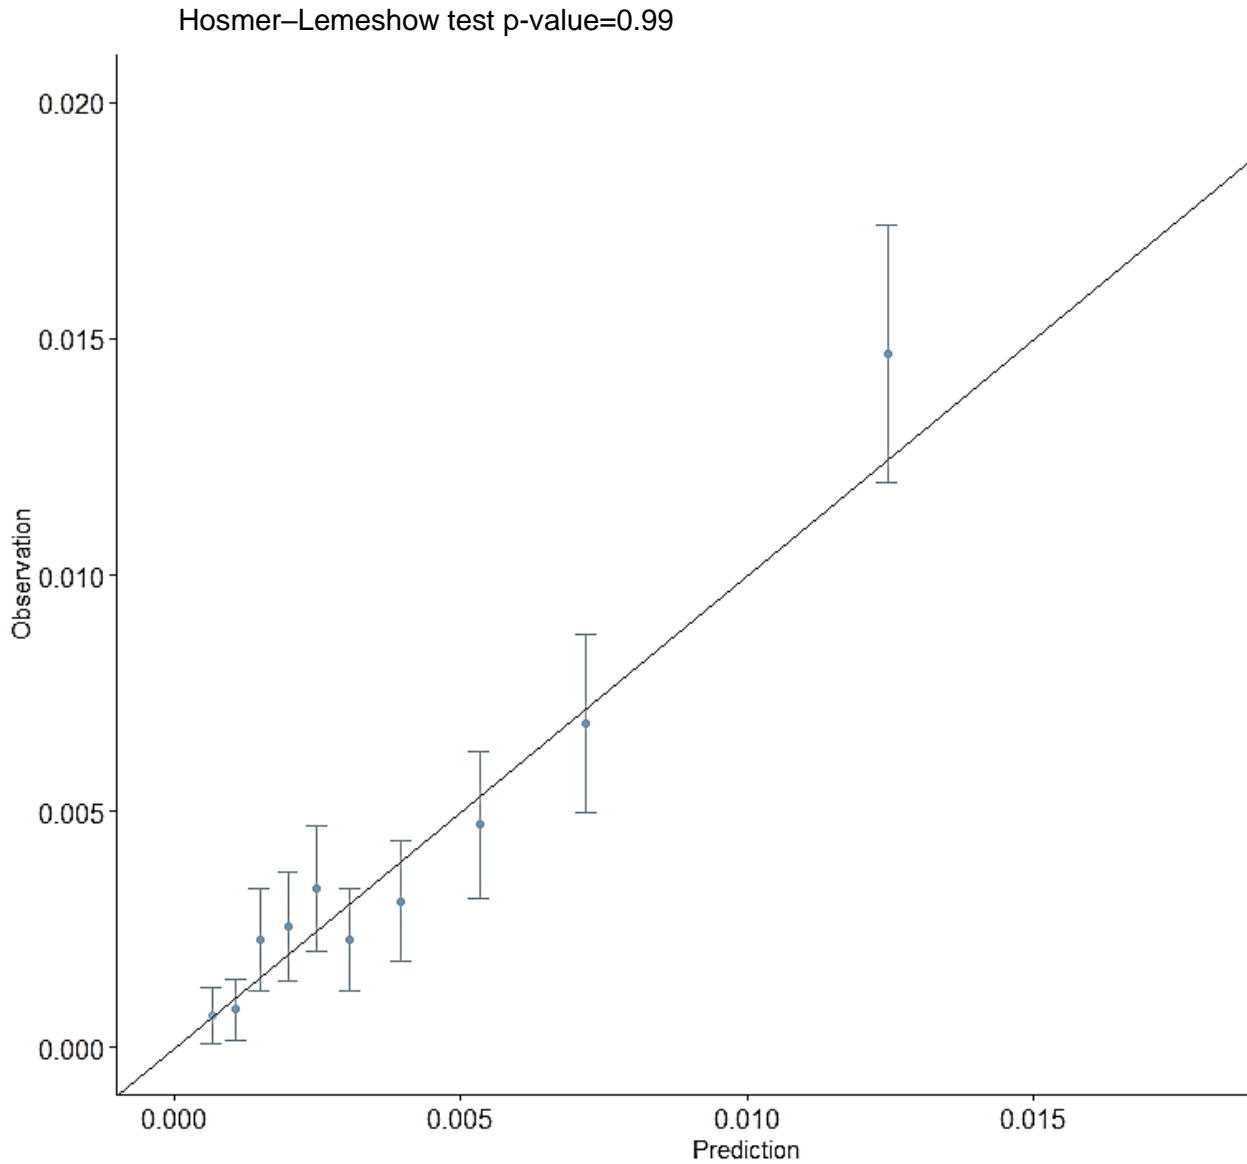

(B) Later-onset preeclampsia (BPT groups + All Risk Factors Model)

Hosmer-Lemeshow test p-value=0.99

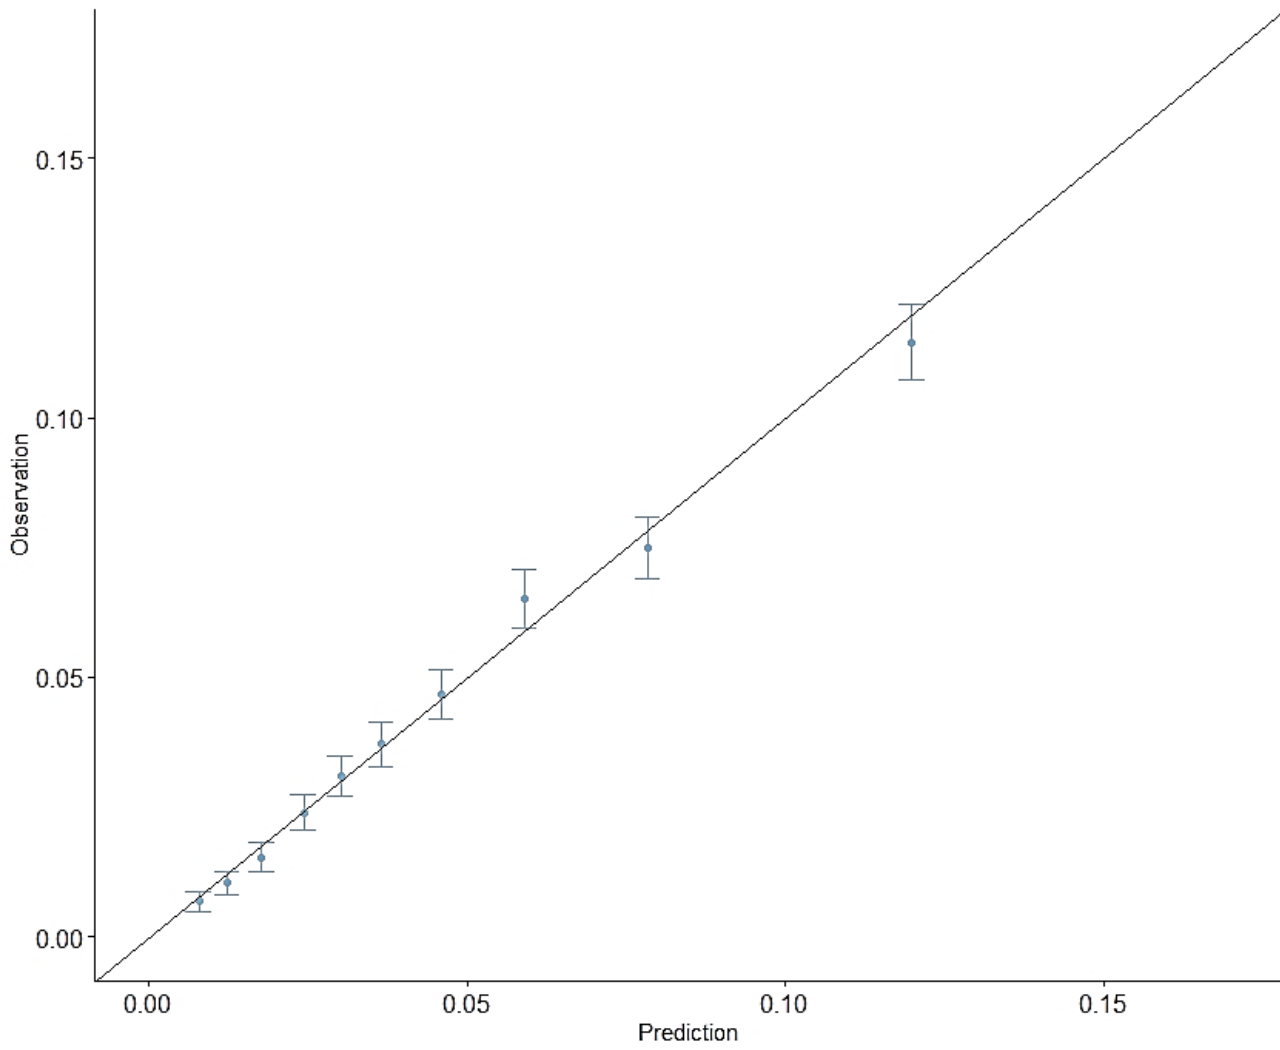



C) Gestational hypertension (BPT groups + All Risk Factors).

Hosmer-Lemeshow test p-value=0.74

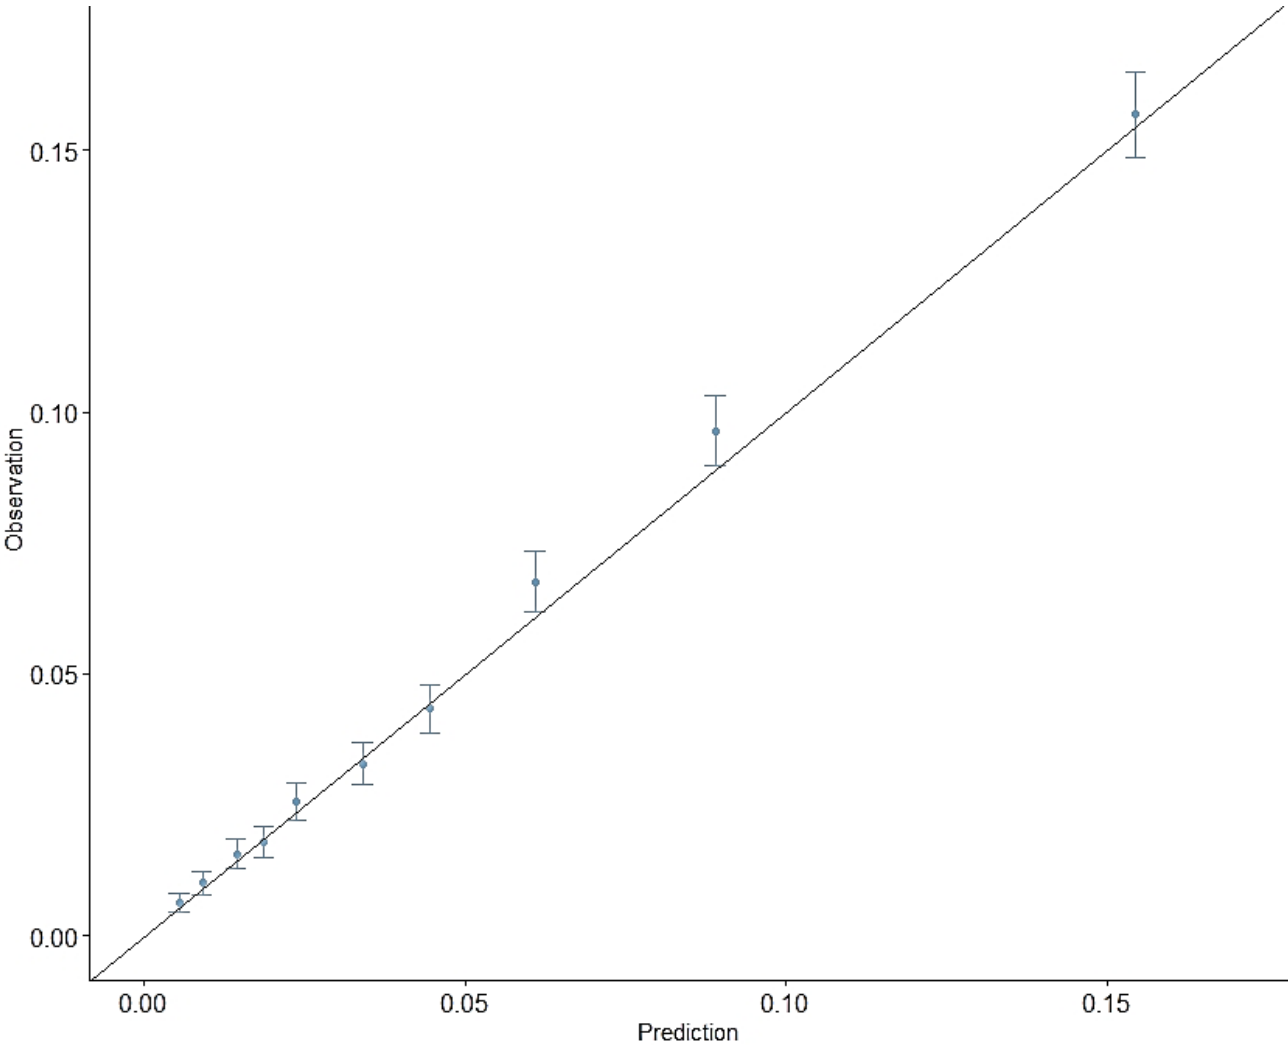

**Figure S4. Distribution of Blood Pressure Measurements by Gestational Age; Percentage of Women with Two Blood Pressure (BP) Measurements, One Blood Pressure Measurement, or Any (One or More) Blood Pressure Measurements within Specific Gestational Age Intervals from 0-20 weeks of gestation.**

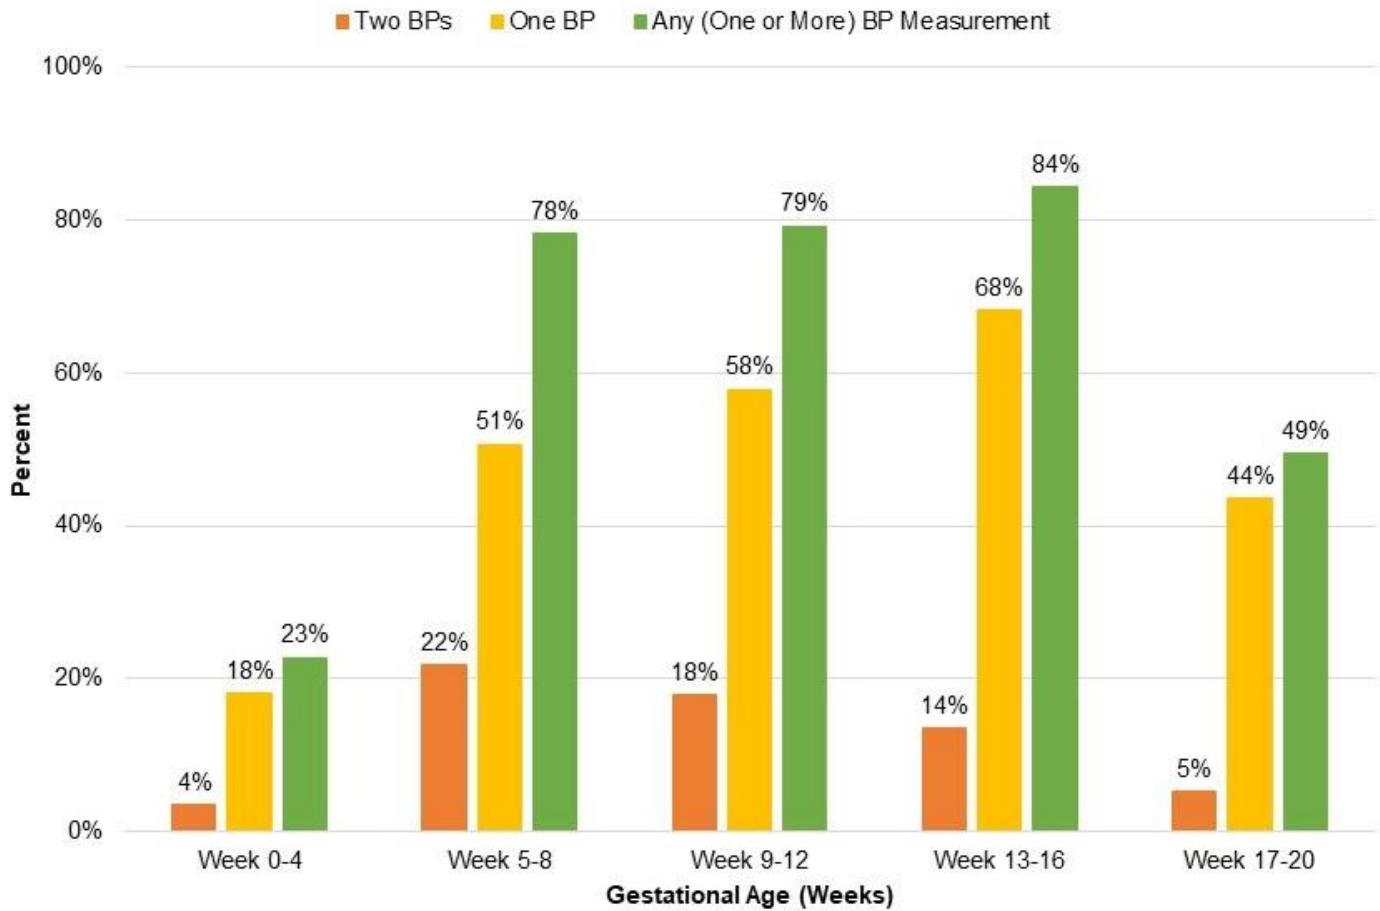

Supplement: JAH3-12-e029617-s001.pdf [file JAH3-12-e029617-s001.pdf]
